# Supplementary material for: A Review of Crop Husbandry and Soil Management Practices Using Meta-Analysis Studies: Towards Soil-Improving Cropping Systems
Source: MDPI journal article supplement (doi:10.3390/land11020255), 2022-02-08
Supplement: s1 [file s1]

## Introduction

In the main text the following ten crop husbandry and soil management practices were considered:

1. Crop type & crop rotations, including intercropping, cover crops and perennial crops
2. Nutrient management
3. Irrigation + fertigation
4. (Controlled) Drainage
5. Tillage
6. Pest management
7. Weed management
8. Crop residue management & mulching
9. Mechanization & technology
10. Landscape management

For each of these practices main effects as reported in meta-analysis studies (plus a few reviews) were collected. Effects were divided into five so-called areas of interest (hereafter: aoi):

- a) Agronomic effects (typically: yield, crop quality)
- b) Soil quality & soil health
- c) Resource use efficiency (mainly: water, nutrients)
- d) Economic aspects
- e) Environmental impacts (mainly: losses of greenhouse gases, and leaching)

These results were presented in the main text either as figures or tables. Here we present all data in the form of tables. As such, the tables of the main text are 1-to-1 copied here, and this gives a total overview of all data collected for these ten crop husbandry and soil management practices. All references provided can be found in the main text, and are not repeated here. Note that the data shown in the figures of the main text all refer to quantitative effect sizes; data provided here in the tables also include a few qualitative results as mentioned by the referenced studies.

# 1. Crop type & crop rotations, including intercropping, cover crops and perennial crops

**Table 1.** Cropping: effects on (a) crop yield and quality, (b) soil quality, (c) economic effects, (d) resource use efficiency, (e) environmental effects, and (f) human health impacts as reported in meta-analysis studies; aoi = area of interest.

| Parameter                                                                                   | aoi    | Management                                                        | Result                                                                                                                                                    |
|---------------------------------------------------------------------------------------------|--------|-------------------------------------------------------------------|-----------------------------------------------------------------------------------------------------------------------------------------------------------|
| <b>Crop type &amp; crop rotation</b>                                                        |        |                                                                   |                                                                                                                                                           |
| Relative yield cereals                                                                      | a      | Crop rotation vs none                                             | +5.99% [a]                                                                                                                                                |
| Yield effect cereals (Mg ha <sup>-1</sup> ), temperate sites                                | a      | Legumes as pre-crops, no N fertilization                          | Broad leaved pre-crop (+1.4), oats (+1.5), cereal (2.2) [b]                                                                                               |
|                                                                                             | a      | Legumes as pre-crops, 20-90 kg N ha <sup>-1</sup> fertilization   | Broad leaved pre-crop (+0.22), oats (+0.53), cereal (+0.7) [b]                                                                                            |
|                                                                                             | a      | Legumes as pre-crops, 100-200 kg N ha <sup>-1</sup> fertilization | Broad leaved pre-crop (-0.09), oats (+0.15), cereal (+1.47) [b]                                                                                           |
| Yield effect (Mg ha <sup>-1</sup> )                                                         | a      | Legumes as pre-crops for rapeseed                                 | +0.59 [b]                                                                                                                                                 |
| Yield effect (Mg ha <sup>-1</sup> )                                                         | a      | Legumes as pre-crops for cereals on editerranean sites            | Broad leaved pre-crop (+0.85), oats (+0.67), cereal (-0.16) [b]                                                                                           |
| Yield effect wheat (Mg ha <sup>-1</sup> )                                                   | a      | Pre-crops vs wheat                                                | Barley (+0.16 ns), oats (+0.53), canola (+0.8), mustard/canola (+0.57), flax/canola (+1.26), all legumes (+0.92), fallow (+1.12), break crops (+0.75) [c] |
| yield                                                                                       | a      | Crop rotation vs continuous monoculture                           | +20% [z]                                                                                                                                                  |
| Soil organic C                                                                              | b      | Rotation versus monoculture                                       | +20 g C m <sup>2</sup> yr <sup>-1</sup> [d]                                                                                                               |
| SMB, SMN, PLFA, dehydrogenase, metabolic quotient, protease activity, urease activity       | b      | Organic vs conventional                                           | 41, 51, 59, 74, ns, 84, 32% [ad]                                                                                                                          |
| Soil organic C, N (%)                                                                       | b      | Rotation vs monoculture                                           | +3.6%C, +5.3% N [e]                                                                                                                                       |
| Soil microbial C, N (%)                                                                     | b      | Rotation vs monoculture                                           | +20.7%, 26.1% N [e]                                                                                                                                       |
| Soil microbial diversity, richness (%)                                                      | b      | Rotation vs monoculture                                           | +3.36%, 15.11% [f]                                                                                                                                        |
| Number of financial competitive over total number                                           | d      | Legumes as pre-crops                                              | 35 out of 53 [b]                                                                                                                                          |
| % Increase in GHG                                                                           | e      | Rotation vs monoculture                                           | +41% in CO <sub>2</sub> eq. per biomass, +46% in kg CO <sub>2</sub> eq. ha <sup>-1</sup> yr <sup>-1</sup> [g]                                             |
| <b>Intercropping</b>                                                                        |        |                                                                   |                                                                                                                                                           |
| Yield of OA*                                                                                | a      | Intercropping cereal and legume                                   | +30% [h]                                                                                                                                                  |
| Relative yield                                                                              | a      | Intercropping cereal and legume                                   | 17% ns [i]                                                                                                                                                |
| Yield as land use efficiency (LER)                                                          | a      | Intercropping with and without maize                              | 1.29, 1.16 [j]                                                                                                                                            |
| N fertilizer equivalent ratio (NFER)                                                        | c      | Intercropping with and without maize                              | 1.33, 1.19 [j]                                                                                                                                            |
| LER (yield), FNER                                                                           | a<br>c | Intercropping maize and soybean vs mono                           | 1.32 ± 0.02 [ac]<br>1.44 ± 0.03 [ac]                                                                                                                      |
| Density of specialist herbivorous insects, generalist herbivorous insects, predator insects | e      | Diversified vs monoculture                                        | -0.1, 0.05 ns, 0.24 [k]                                                                                                                                   |
| Density herbivorous insects                                                                 | e      | Diversified vs monoculture                                        | -60% [l]                                                                                                                                                  |
| Plant disease incidence                                                                     | e      | Intercropping cereals with faba bean vs no intercropping          | -45% [u]                                                                                                                                                  |

| <b>Cover crops</b>                                                                                                        |   |                                                                                                      |                                                                                                                 |
|---------------------------------------------------------------------------------------------------------------------------|---|------------------------------------------------------------------------------------------------------|-----------------------------------------------------------------------------------------------------------------|
| Increase maize yield                                                                                                      | a | Grass, legume or biculture winter cover crop vs fallow before maize in North America                 | 0% ns, +37%, +21% [m]                                                                                           |
| Crop yield                                                                                                                | a | Non-legume, leguminous cover crop vs fallow in winter                                                | -3%, 6% [p]                                                                                                     |
| Soil organic C                                                                                                            | b | Cover crops versus fallow in winter                                                                  | +0.32 Mg C ha <sup>-1</sup> yr <sup>-1</sup> [n]                                                                |
| Food crop yield                                                                                                           | a | non-legumes, legumes resp. as winter cover crops in Mediterranean vs no winter cover                 | -7%, 16% [ab]                                                                                                   |
| Soil nitrate leaching                                                                                                     | e |                                                                                                      | -53%, ns [ab]                                                                                                   |
| SOM, SMB, soil N, soil water content, food crop damage, weed abundance, weed diversity                                    | b | Winter cover crops in Mediterranean vs no winter cover                                               | +9%, +41 -22, -13, ns, -27, -13% [ab]                                                                           |
| SOC                                                                                                                       | b | cover crops                                                                                          | +6%[ae]                                                                                                         |
| Soil infiltration rate                                                                                                    | b | Cover crops vs none                                                                                  | 34.8% [af]                                                                                                      |
| cash crop yield                                                                                                           | a | Cover crops vs none                                                                                  | 6% [aa]                                                                                                         |
| soil aggregate stability, leaching, infiltration, MBN, soil BD, SOC, soil nitrogen, MBN, saturated hydraulic conductivity | b |                                                                                                      | 13, -62, 74, 27, -1, 9, ns, 26, 133% [aa]                                                                       |
| erosion, runoff, weed suppression                                                                                         | e |                                                                                                      | -75, -73, -45 [aa]                                                                                              |
| AM colonization cash crop roots                                                                                           | b | Cover crops versus fallow                                                                            | +28.5% [o]                                                                                                      |
| Nitrate leaching                                                                                                          | e | Non-legume cover crop vs bare: in Nordic countries [16], global (17, 23], and irrigated systems [18] | -50% [p], -70% [q], -56% [w], -50% [r]                                                                          |
| Ratio GHG's                                                                                                               | e | Cover crops vs fallow                                                                                | +46% CO <sub>2</sub> , +49% N <sub>2</sub> O [v],                                                               |
| N <sub>2</sub> O emission in grain crops                                                                                  | e | Cover crops vs fallow, whole-year, only cover crops period                                           | ns [x], -58% N <sub>2</sub> O [x]                                                                               |
| Ratio nematode abundance                                                                                                  | e | Cover crops vs fallow                                                                                | +29% [v]                                                                                                        |
| Weed biomass                                                                                                              | e | Cover crops vs none in corn-soybean rotation in U.S. Midwest                                         | -75% [y]                                                                                                        |
| <b>Perennial crops</b>                                                                                                    |   |                                                                                                      |                                                                                                                 |
| Soil organic C                                                                                                            | b | Cover crops vs bare between vines; olive trees                                                       | +0.78; 1.1 Mg C ha <sup>-1</sup> yr <sup>-1</sup> [s]                                                           |
| Soil organic C                                                                                                            | b | Miscanthus vs control without                                                                        | +0.40 Mg C ha <sup>-1</sup> yr <sup>-1</sup> [t]                                                                |
| % Decrease in GHG                                                                                                         | e | Perennial vs monoculture                                                                             | -168% in CO <sub>2</sub> eq. per biomass, -215% in kg CO <sub>2</sub> eq. ha <sup>-1</sup> yr <sup>-1</sup> [g] |

[a] (Van den Putte, Govers, Diels, Gillijns, & Demuzere, 2010); [b] (Preissel, Reckling, Schläfke, & Zander, 2015) [c] (Angus et al., 2015); [d] (West & Post, 2002); [e] (McDaniel, Tiemann, & Grandy, 2014); [f] (Venter, Jacobs, & Hawkins, 2016); [g] (Sainju, 2016); [h] (Bedoussac et al., 2015); [i] (Y. Yu, Stomph, Makowski, Zhang, & van der Werf, 2016); [j] (C. Li et al., 2020); [k] (Dassou & Tixier, 2016); [l] (Tonhasca Jr & Byrne, 1994),[m] (Miguez & Bollero, 2005); [n] (Poeplau & Don, 2015); [o] (Timothy M. Bowles, Louise E. Jackson, Malina Loeher, & Timothy R. Cavagnaro, 2016); [p] (Valkama, Lemola, Känkänen, & Turtola, 2015); [q] (Tonitto, David, & Drinkwater, 2006); [r] (Quemada, Baranski, Nobel-de Lange, Vallejo, & Cooper, 2013); [s] (Vicente-Vicente, García-Ruiz, Francaviglia, Aguilera, & Smith, 2016); [t] (Poeplau & Don, 2014); [u] (C. Zhang et al., 2019) [v] (Daryanto, Wang, & Jacinthe, 2017); [w] (Thapa, Mirsky, & Tully, 2018); [x] (Han, Walter, & Drinkwater, 2017); [y](Nichols et al., 2020); [z] (J. Zhao et al., 2020); [aa] (J. Jian, Lester, Du, Reiter, & Stewart, 2020); [ab] (Shackelford, Kelsey, & Dicks, 2019); [ac] (Z. Xu et al., 2020); [ad] (Lori, Symnaczik, Mäder, De Deyn, & Gatteringer, 2017); [ae] (Bai et al., 2019b); [af] (Basche & DeLonge, 2019).

\* OA: organic agriculture

## 2. Nutrient management

**Table 2.** Nutrient management: effects on (a) crop yield and quality, (b) soil quality, (c) economic effects, (d) resource use efficiency, (e) environmental effects, and (f) human health impacts as reported in meta-analysis studies; ao = area of interest.

| Parameter                                                                                                                                                 | ao    | Management                                                                                            | Result                                                                                 |
|-----------------------------------------------------------------------------------------------------------------------------------------------------------|-------|-------------------------------------------------------------------------------------------------------|----------------------------------------------------------------------------------------|
| Yield                                                                                                                                                     | a     | Organic fertiliser in Mediterranean fruit orchards                                                    | Increase in 67% of studies ns [a]                                                      |
| Yield maize                                                                                                                                               | a     | Split application of N fertiliser vs early                                                            | -2.01% ns [b]                                                                          |
| Yield                                                                                                                                                     | a     | Fertilizer placement vs broadcast                                                                     | +3.7% [o]                                                                              |
| Yield                                                                                                                                                     | a     | animal manure vs mineral:<br>-in wheat, sugar beet, barley<br>-in potatoes<br>-in maize<br>-all crops | n.s. [c]<br>+7% ±4.9 [c]<br>+4% ±3.7 [c]<br>ns [c]                                     |
| Yield                                                                                                                                                     | a     | Organic manure vs mineral: Wheat, Rice, Millet, Maize, barley                                         | +27% [d]                                                                               |
| Yield                                                                                                                                                     | a     | Lime: CaO, CaCO <sub>3</sub> , Ca(OH) <sub>2</sub> , CaMg(CO <sub>3</sub> ) <sub>2</sub>              | +13.2, 34.3, 29.2, 66.5% [e]                                                           |
| Yield, WP, NUE maize                                                                                                                                      | a     | Optimal vs non-optimal water and N supply                                                             | 27.9%, 27.9%, 20.5% [i]                                                                |
| Increase N uptake                                                                                                                                         | a     | Urease, nitrification, and combined inhibitors                                                        | +24.1%, +10.5%, +47.6% [j]                                                             |
| % of studies: SOM                                                                                                                                         | b     | Organic fertiliser in Mediterranean fruit orchards                                                    | Increase in 87% of studies [a]                                                         |
| SOM, SMC*                                                                                                                                                 | b     | Mineral N fertiliser<br>Inorganic and organic N fertiliser                                            | +12.08%, +15.05% [g]<br>+7.6%, -9.5 [h]                                                |
| SOM, SMC, EEA*                                                                                                                                            | b     | Organic manure vs mineral                                                                             | +38% +51%, +39% [d]                                                                    |
| Plant available water                                                                                                                                     | b     | Organic manure vs none                                                                                | -10 to + 30% [m]                                                                       |
| Maximum economic return                                                                                                                                   | d     | N fertilisation for sugar beet (UK)                                                                   | 105 kg N ha <sup>-1</sup> [f]                                                          |
| Decrease of N loss                                                                                                                                        | e     | Urease, nitrification, and combined inhibitors                                                        | -32.9, -14.5, -37.6% [j]                                                               |
| NO emissions                                                                                                                                              | e     | Nitrification inhibitors                                                                              | -80% [n]                                                                               |
| Nitrate leaching, N <sub>2</sub> O emission                                                                                                               | e     | Biochar                                                                                               | -13%, -38% [k]                                                                         |
| N <sub>2</sub> O emissions in grain crops                                                                                                                 | e     | N fertiliser use according to recommendation vs higher N use                                          | -55% [l]                                                                               |
| NH <sub>3</sub> emissions                                                                                                                                 | e     | Urease inhibitor, manure acidification deep placement                                                 | - 24.3 to 68.7%<br>-88.8 to 95.0%,<br>-93.8 to 99.7% [p]                               |
| Survival time zoonotic pathogens                                                                                                                          | human | Animal manure vs none                                                                                 | +20% [q]                                                                               |
| Yield upland crop                                                                                                                                         | a     | Partial and 100% substitution of mineral vs animal manure                                             | +6.6, -9.6% [r]                                                                        |
| Yield rice                                                                                                                                                | a     | Manure N: upland, paddy soil                                                                          | +3.3%, -4.1% [r]                                                                       |
| NH <sub>3</sub> emission factor                                                                                                                           | e     | Manure N: upland, paddy soil                                                                          | 0.56%, 0.17% [r]                                                                       |
| N <sub>2</sub> O emission factor                                                                                                                          | e     | Manure N: upland, paddy soil                                                                          | 11.1%, 6.5% [r]                                                                        |
| Yield, pH, SWA*, SOC, TN, N <sub>av</sub> , P <sub>av</sub> , K <sub>av</sub> , urease, sucrase, catalase, bacteria, fungi, actinomycetes, BD             | a     | Animal vs mineral fertilizer in China                                                                 | +7.6, 3.3, 28.8, 17.7, 15.5, 16, 66.2, 19.1, 23.5, 18.3, 16.1, 60, 27.7, 38, -3.9% [t] |
| Relative yield increase of fruit crops                                                                                                                    | a     | Application of N,P, or K fertilizer                                                                   | 78, 82.9, 82.4% [s]                                                                    |
| CBH activity, C-acq activity, AP activity, BX activity, BG activity, AG activity, urease activity, MBC, PEO activity, OX activity, PHO activity, SOC, TN, | b     | N enrichment in farmland                                                                              | 6.4, 9.1, 10.6, 11, 11.2, 12, 18.6, -9.5, -6.1, -7.9, -11.1, 7.6 15.3% [u]             |
| Soil fungal diversity                                                                                                                                     | b     | Effect fertiliser:soil pH<6, soil pH>6                                                                | n.s, - H [v]                                                                           |
| Soil C, N, P,                                                                                                                                             | b     | grazing intensity; High vs low                                                                        | -4.3%, -9.9, +3.6%[w]                                                                  |

|                                                                                                                                                 |   |                                                                  |                                                              |
|-------------------------------------------------------------------------------------------------------------------------------------------------|---|------------------------------------------------------------------|--------------------------------------------------------------|
| Corn yield                                                                                                                                      | a | Sub-surface banded starter fertilizer application vs none in USA | +5.2%[x]                                                     |
| MBC, MBN<br>β-1,4-glucosidase,<br>dehydrogenase, urease,<br>N-acetyl-β-glucosaminidase,<br>alkaline phosphatase, acid<br>phosphatase, sulfatase | b | Animal manure vs none                                            | +88, +84%[y]<br>147,<br>114, 39,<br>112,<br>58, 104,<br>228% |
| NH <sub>3</sub> NO <sub>x</sub> CH <sub>4</sub> CO <sub>2</sub> emissions                                                                       | e | Slurry acidification vs raw                                      | -69, -21, -86, -15% [z]                                      |

[a] (Morugán-Coronado, Linares, Gómez-López, Faz, & Zornoza, 2020); [b] (Fernandez, DeBruin, Messina, & Ciampitti, 2019); [c] (Hijbeek et al., 2017); [d] (G. Luo et al., 2018); [e] (Y. Li, Cui, Chang, & Zhang, 2019); [f] (Jaggard, Qi, & Armstrong, 2009); [g] (Geisseler & Scow, 2014); [h] *not used*; [i] (Y. Li, Z. Li, et al., 2019); [j] (Sha et al., 2020); [k] (Borchard et al., 2019); [l] (Han et al., 2017); [m] (Eden, Gerke, & Houot, 2017); [n] (Liu et al., 2017); [o] (Nkebiwe, Weinmann, Bar-Tal, & Müller, 2016); [p] (Ti, Xia, Chang, & Yan, 2019); [q] (Tran et al., 2020); [r] (X. Zhang et al., 2020); [s] (W. Li et al., 2020); [t] (Y. Du et al., 2020); [u] (S. Jian et al., 2016); [v] (Ye et al., 2020); [w] (M. He et al., 2020); [x] (Quinn, Lee, & Poffenbarger, 2020); [y] (S. Liu et al., 2020); [z] (Emmerling, Krein, & Junk, 2020).

\*SOM: soil organic matter, SMB: soil microbial carbon, EEA: soil extracellular enzyme activity

### 3. Irrigation + fertigation

**Table 3.** Irrigation and fertigation: effects on (a) crop yield and quality, (b) soil quality, (c) economic effects, (d) resource use efficiency, (e) environmental effects, and (f) human health impacts as reported in meta-analysis studies; aoi = area of interest. DI = deficit irrigation, PRD = partial rootzone drying, FI = full irrigation, AI = aerated irrigation, NAI non-aerated irrigation, RDI = regulated deficit irrigation, CDI = conventional deficit irrigation, CI = conventional irrigation, OI = over-irrigation, UI = under-irrigation, OPTI = optimal irrigation.

| Parameter                                                             | aoi | Management                                                      | Result                                                                           |
|-----------------------------------------------------------------------|-----|-----------------------------------------------------------------|----------------------------------------------------------------------------------|
| Yield                                                                 | a   | DI or PRD vs FI                                                 | -0.8 (standardized mean difference) [2]                                          |
|                                                                       |     | AI vs NAI                                                       | +30.4% [9]                                                                       |
|                                                                       |     | RDI vs FI                                                       | +19.3%, +17.9% [4]                                                               |
| Yield, WUE*                                                           | a,c | AI vs NAI                                                       | -18.6 t ha <sup>-1</sup> , +2.3 kg m <sup>-3</sup> [5]                           |
|                                                                       |     | RDI vs FI                                                       | -16.2%, +6.6% [8]                                                                |
|                                                                       |     | DI vs FI                                                        | +26.4%, +26.8% and +17.0% [12]                                                   |
| Yield, WP, NUE* of maize                                              | a   | OPTI vs OI                                                      | +25.3%, +25.1% and +19.8% [12]                                                   |
|                                                                       |     | OPTI vs UI                                                      | +12.4%, +27.6%, +12.9% [6]                                                       |
| Yield, WUE, NUE* citrus                                               | a,c | OPTI vs OI                                                      | +20.2%, +3.7%, +20.2% [6]                                                        |
|                                                                       |     | OPTI vs UI                                                      | +4.1% to +5% [1]                                                                 |
| Total soluble solids (fruit quality)                                  | a   | DI vs FI, PRD vs FI                                             | significant improvement [5]                                                      |
| Vitamin C content fruits                                              | a   | RDI vs FI                                                       | significant improvement [5]                                                      |
| Water productivity                                                    | c   | PRD vs CI                                                       | +83% [7]                                                                         |
|                                                                       |     | CDI vs CI                                                       | +76% [7]                                                                         |
|                                                                       |     | I vs non-I                                                      | +9.9% [9]                                                                        |
| N <sub>2</sub> O emission factor                                      | e   | I                                                               | +0.5% [3]                                                                        |
| NH <sub>3</sub> , N <sub>2</sub> O emission, NO <sub>3</sub> leaching | e   | I vs non-I                                                      | -9.3%, -42.3%, +36.1% [9]                                                        |
| Soil respiration, SOC*                                                | b   | I vs non-I                                                      | +9.7% [10], +1.27% ns [11]                                                       |
| Yield                                                                 | a   | Micro irrigation vs furrow irrigation                           | +36.7 (wheat), -21.4 (cotton) [a]                                                |
| ET = Water use                                                        | c   | Micro irrigation vs furrow irrigation                           | -22.7 (wheat), -36.8 (cotton) [a]                                                |
| Yield                                                                 | a   | Optimized water management vs continuous flooding (rice; China) | <0 (severe soil water shortage) [b]                                              |
|                                                                       |     |                                                                 | +1 to +6% (mild water shortage) [b]                                              |
| WUE, WP                                                               | c   | Optimized water management vs continuous flooding (rice; China) | -40%, +34% [b]                                                                   |
| GHG                                                                   | e   | Optimized water management vs continuous flooding (rice; China) | -37% (lower methane emission; lower energy consumption by irrigation system) [b] |
| WUE                                                                   | c   | Furrow irrigation vs rainfed                                    | +14% (not significant) [c]                                                       |
| WUE                                                                   | c   | Pivot irrigation vs rainfed                                     | +99% [c]                                                                         |
| WUE                                                                   | c   | Subsurface drip irrigation vs rainfed                           | +147% [c]                                                                        |
| NUE (NPPF; yield per unit input)                                      | c   | Irrigation vs no irrigation                                     | +24% [d]                                                                         |
| Yield                                                                 | a   | Non-continuous flooding vs continuous flooding (rice)           | -3.6% [e]                                                                        |
| CH <sub>4</sub> , N <sub>2</sub> O                                    | e   | Non-continuous flooding vs continuous flooding (rice)           | -53%, +105% [e]                                                                  |
| GWP (CH <sub>4</sub> + N <sub>2</sub> O); idem, yield-scaled          | e   | Non-continuous flooding vs continuous flooding (rice)           | -44%, -42% [e]                                                                   |
| Yield                                                                 | a   | Optimal irrigation vs farmer irrigation (maize)                 | +6.5% [f]                                                                        |
| ET = Water use                                                        | c   | Optimal irrigation vs farmer irrigation (maize)                 | -10.9% [f]                                                                       |
| WP                                                                    | c   | Optimal irrigation vs farmer irrigation (maize)                 | +18.1% [f]                                                                       |

[1] (Adu et al., 2019); [2] (Adu, Yawson, Armah, Asare, & Frimpong, 2018); [3] (Cayuela et al., 2016); [4] (Y.-D. Du et al., 2018); [5] (J. Lu, Shao, Cui, Wang, & Keabetswe, 2019); [6] (Qin, Assinck, Heinen, & Oenema, 2016); [7] (Sadras, 2008); [8] (L. Yu, Zhao, Gao, & Siddique, 2020); [9] (H. Zheng et al., 2019); [10] (L. Zhou et al., 2016); [11] (X. Zhou et al., 2016); [12] (Y. Li, Z. Li, et al., 2019); [a] (Fan, Wang, & Nan, 2018); [b] (He, Wang, & Cui, 2020); [c] (Mitchell-McCallister, Cano, & West, 2020); [d] (B.-Y. Liu et al., 2020); [e] (Jiang et al., 2019); [f] (H. Zheng et al., 2020).

\* WUE: water use efficiency, WP: water productivity, NUE: nitrogen use efficiency, SOC: soil organic pool;

## 4. (Controlled) Drainage

**Table 4.** Controlled drainage: effects on (a) crop yield and quality, (b) soil quality, (c) economic effects, (d) resource use efficiency, (e) environmental effects, and (f) human health impacts as reported in meta-analysis studies; aoi = area of interest (see Table 1).

| Parameter                                                 | aoi | Management                     | Result                                           |
|-----------------------------------------------------------|-----|--------------------------------|--------------------------------------------------|
| Equal annual cost                                         | d   | Drainage vs none               | 9 to 37 \$ ha <sup>-1</sup> yr <sup>-1</sup> [3] |
| CH <sub>4</sub> Emission from peat                        | e   | Drainage vs none               | -84% [1]                                         |
| Drainage volume                                           | e   | Drainage vs none               | -47% [2]; -17% to -85% [4]                       |
| N-load                                                    | e   | Drainage vs none               | -41% [3]; -18% to -85% [4]                       |
| Yield                                                     | a   | Controlled drainage vs control | 0.11 ns [a]                                      |
| Drain volume                                              | b   | Controlled drainage vs control | -19.23% [a]                                      |
| NO <sub>3</sub> -N concentration; NO <sub>3</sub> -N loss | b   | Controlled drainage vs control | -19.07%; -36.11% [a]                             |
| NH <sub>4</sub> -N concentration; NH <sub>4</sub> -N loss | b   | Controlled drainage vs control | +35.20%; -18.90% [a]                             |
| N <sub>tot</sub> concentration; N <sub>tot</sub> loss     | b   | Controlled drainage vs control | -0.59% ns; -31.80% [a]                           |
| P <sub>tot</sub> concentration; P <sub>tot</sub> loss     | b   | Controlled drainage vs control | +1.55% ns; -18.79% [a]                           |

[1] (Abdalla, Chivenge, Ciais, & Chaplot, 2016); [2] (Amenumey et al., 2009); [3] (Christianson, Tyndall, & Helmers, 2013); [4] (Skaggs, Youssef, Gilliam, & Evans, 2010); [a] (Z. Wang et al., 2020)

"A meta-analysis indicated that water management options, including single and multiple drainage approaches such as alternative wetting and drying (AWD), significantly reduced CH<sub>4</sub> emissions by 35% as a mean effect size (95% confidential interval: 41-29%), as well as the combined effects of CH<sub>4</sub>+N<sub>2</sub>O (net GWP) by 29% (36-23%) (Yagi et al., 2019)."

This is very specific for rice cropping systems where during the growing season every now and then the water level is lowered (drained).

## 5. Tillage

(de Paul Obade & Lal, 2014): non-significant effects for SOC, EC, BD, pH and AWC in Central Ohio, USA; 5 sites with conventional tillage, no-till and natural vegetation land uses.

**Table 5.** Soil tillage: effects on (a) crop yield and quality, (b) soil quality, (c) economic effects, (d) resource use efficiency, (e) environmental effects, and (f) human health impacts as reported in meta-analysis studies; aoi = area of interest. NT = no-tillage, TT = traditional tillage, CA = conservation agriculture, RT = reduced tillage, MT = minimum tillage.

| Parameter                                                      | aoi  | Management                               | result                                                                       |
|----------------------------------------------------------------|------|------------------------------------------|------------------------------------------------------------------------------|
| Yield                                                          | a    | NT vs TT                                 | 0 [12, 19, 30, 32 ]                                                          |
|                                                                |      | NT vs TT                                 | -6% [23]; -5% [24, 27]                                                       |
|                                                                |      | NT vs TT (China)                         | -2% without, +5% with residues [36]                                          |
|                                                                |      | NT vs TT (Med.)                          | 7% [13]; ns [31]                                                             |
|                                                                |      | NT vs TT (China)                         | 10% [33 ]; 3% [35 ]                                                          |
| Crop yield, weeds in organic farming                           | a, e | Shallow non-inversion vs TT              | -7.6%, +50% [7]                                                              |
| Costs (\$ per t C)                                             | d    | NT vs TT (North America)                 | 10-400 [20]                                                                  |
| GWP* rice                                                      | e    | NT vs TT (China)                         | -20% [30]                                                                    |
| Yield, CH <sub>4</sub> uptake, N <sub>2</sub> O, GHG emissions | a, e | NT vs TT annual wheat and maize.         | -3, +23, 0 ns, 0 ns% [34] NE China                                           |
| CH <sub>4</sub> , N <sub>2</sub> O                             | e    | NT vs TT without residues                | -30%, +82% [37] in rice                                                      |
| CO <sub>2</sub> , CH <sub>4</sub> , N <sub>2</sub> O, GHG      | e    | NT vs TT                                 | -9% ns, -15%, +10%, 0% [12]                                                  |
| N <sub>2</sub> O emission, EF <sub>ad</sub> **                 | e    | CA vs TT                                 | +18%, +0.40% [21]                                                            |
| CO <sub>2</sub> emissions                                      | e    | NT vs TT                                 | -21% [1]                                                                     |
| P runoff                                                       | e    | NT vs TT (dissolved, total, particulate) | +35%, -45%, -55% [8]                                                         |
| Herbicide loss runoff                                          | e    | NT vs TT                                 | ns [10]                                                                      |
| Pesticide runoff                                               | e    | NT vs TT                                 | +55%, +50% [28]                                                              |
| WUE                                                            | c    | NT vs TT (China)                         | 6% [32 ]; 10% [33]                                                           |
| AMF colonization                                               | b    | Low-intensity tillage vs TT              | +27%,                                                                        |
| AMF richness                                                   |      |                                          | +11% [5]                                                                     |
| Bacteria, fauna diversity                                      | b    | NT vs TT                                 | +8%, +21% [9]                                                                |
| DOC                                                            | b    | NT vs TT                                 | Increased [14]                                                               |
| EOC                                                            | b    | NT vs TT                                 | +17% [15]                                                                    |
| NO                                                             | e    | NT vs TT                                 | -30% [17]                                                                    |
| C stock topsoil                                                | b    | NT vs TT                                 | 0 [18]                                                                       |
| Runoff                                                         | e    | NT vs mouldboard ploughing               | -27% [25]                                                                    |
| SOC                                                            | b    | RT and NT vs TT (Med.)                   | -0,16, +0.85 Mg C ha <sup>-1</sup> [11]                                      |
|                                                                |      |                                          | +15%, +11.4% [2]                                                             |
| SOC                                                            | b    | NT vs TT                                 | 0 [26], >0 [1,3,7,31,38]                                                     |
|                                                                |      | CA vs TT                                 | 5% [4]                                                                       |
|                                                                |      | NT vs TT (China)                         | 3.8-5.1% [29]                                                                |
| SOC, total N, water storage, K avail                           | b    | NT vs TT (China)                         | 10.2%, 9%, 9%, 11% [36]                                                      |
| SOC, beta-glucosidase, micr. biomass C, dehydrog. activity     | b    | CA vs TT (Med.)                          | 9%; 18%, 26%, 30% [13]                                                       |
| Pot. min. nitrogen                                             | b    | CA vs TT                                 | 13% [19]                                                                     |
| Worms abund., worms mass                                       | b    | NT vs TT                                 | 137%, 196% [6]                                                               |
|                                                                |      | RT vs TT                                 | 50%, 75% [6]                                                                 |
|                                                                |      | NT vs TT                                 | 90%, 67% [22]                                                                |
| P avail.                                                       | b    | NT or MT vs TT (Med.)                    | 0 [31]                                                                       |
| Total N                                                        | b    | Idem                                     | 0 [31, NT], 9% [13]; >0 [31, MT]                                             |
| Soil physical parameters                                       | b    | NT vs TT                                 | BD 2% [3]; 1-3% [16], AWC 5-10%, Ksat 25%, MWD 52%, PR 37%, WSA 55% [16] *** |
| C seq.                                                         | b    | Conservation agriculture vs conventional | +16.3% [a]                                                                   |
| Water use                                                      | c    | Conservation agriculture vs conventional | significant less [a]                                                         |



|                                   |   |                                                          |                                       |
|-----------------------------------|---|----------------------------------------------------------|---------------------------------------|
| Costs and returns                 | d | Conservation agriculture vs conventional                 | higher returns and lower costs [a]    |
| CO <sub>2</sub> , CH <sub>4</sub> | e | Conservation agriculture vs conventional                 | -4.3%, -25.7% [a]                     |
| N <sub>2</sub> O, NO <sub>2</sub> | e | Conservation agriculture vs conventional                 | +5.2%, +14.5% [a]                     |
| SOC                               | b | Conservation tillage vs conventional tillage             | +5% [b]                               |
| SOC                               | b | No-tillage or reduced tillage vs conventional tillage    | +8% [b]                               |
| SOC                               | b | No-till vs mouldboard plough                             | +38%                                  |
|                                   |   | Chisel vs mouldboard plough                              | +14%                                  |
|                                   |   | Perennial vs mouldboard plough                           | +95% [c]; 0-15 cm depth               |
| MBC, MBN, Resp.                   | b | No-till vs mouldboard plough                             | +34%, +21%, +49%                      |
|                                   |   | Chisel vs mouldboard plough                              |                                       |
|                                   |   | Perennial vs mouldboard plough                           | +34%, +37% (ns), +8% (ns)             |
|                                   |   |                                                          | +131%, +206%, +92% [c]; 0-15 cm depth |
| Prot, AC, BG                      | b | No-till vs mouldboard plough                             | +49%, +37%, +55%                      |
|                                   |   | Chisel vs mouldboard plough                              |                                       |
|                                   |   | Perennial vs mouldboard plough                           | 3* no data                            |
|                                   |   |                                                          | +92%, +225%, +61% [c]; 0-15 cm depth  |
| N-losses <sup>1</sup>             | e | Conservation tillage vs traditional tillage              | -39.9% [d]                            |
| N-losses <sup>1</sup>             | e | No-till vs traditional tillage                           | -63.7% [d]                            |
| N-losses <sup>1</sup>             | e | Mulch-tillage vs traditional tillage                     | -25.6% (ns) [d]                       |
| SOC                               | b | No-till vs traditional tillage                           | +20.9% [e]                            |
| pH                                | b | No-till vs traditional tillage                           | 0% [e]                                |
| N total                           | b | No-till vs traditional tillage                           | +27.1% [e]                            |
| Microbial community               | b | No-till vs traditional tillage                           | +3.0% [e]                             |
| Bacterial community               | b | No-till vs traditional tillage                           | +5.5% [e]                             |
| Fungal community                  | b | No-till vs traditional tillage                           | 0% [e]                                |
| Microbial biomass                 | b | Conservation tillage (NT, RT) vs traditional tillage     | +37% [f]                              |
|                                   |   |                                                          | (ns in sandy soils)                   |
| Fungal biomass                    | b | Conservation tillage (NT, RT) vs traditional tillage     | +31% [f]                              |
|                                   |   |                                                          | (ns in sandy soils)                   |
| Bacterial biomass                 | b | Conservation tillage (NT, RT) vs traditional tillage     | +11% [f]                              |
|                                   |   |                                                          | (ns in sandy soils)                   |
| SOC                               | b | Conservation tillage (NT, RT) vs traditional tillage     | +22% [f]                              |
| N tot                             | b | Conservation tillage (NT, RT) vs traditional tillage     | +22% [f]                              |
| Insect and slug pests             | b | Reduced tillage vs traditional tillage                   | ns [g]                                |
| Arthropod predators               | b | Reduced tillage vs traditional tillage                   | ns [g]                                |
| Runoff                            | b | Minimum soil disturbance vs conventional tillage (China) | -36.1% [h]                            |
| Sediment yield                    | b | Minimum soil disturbance vs conventional tillage (China) | -51.7% [h]                            |
| Bacterial count                   | b | Reduced tillage vs traditional tillage                   | 0% [i]                                |
| Fungal count                      | b | Reduced tillage vs traditional tillage                   | +16% (ns) [i]                         |
| Bacterial count                   | b | No-till vs traditional tillage                           | +14% [i]                              |
| Fungal count                      | b | No-till vs traditional tillage                           | +58% (ns) [i]                         |
| MWD (0-5 cm)                      | b | No-till vs traditional tillage                           | +57.9% [j]                            |
| Field capacity (0-5 cm)           | b | No-till vs traditional tillage                           | +15.5% [j]                            |
| Dry bulk density (5-10 cm)        | b | No-till vs traditional tillage                           | +4.7 (ns) [j]                         |
| Infiltration rate                 | b | No-till vs traditional tillage                           | +66% [j]                              |
| SOC - total                       | b | No-till vs traditional tillage                           | +1.1% (ns) [j]                        |
| SOC (0-5 cm)                      | b | No-till vs traditional tillage                           | +37.9% [j]                            |
| Lrv (0-5 cm)                      | b | No-till vs traditional tillage                           | +34.7% [j]                            |
| Lrv (other depths)                | b | No-till vs traditional tillage                           | ns [j]                                |
| Yield                             | a | Occasional tillage vs no-till                            | ns [k]                                |

|                                |   |                                                      |                                                                                                                                                               |
|--------------------------------|---|------------------------------------------------------|---------------------------------------------------------------------------------------------------------------------------------------------------------------|
| Yield                          | a | Occasional subsoiler tillage vs no-till              | +36% [k]                                                                                                                                                      |
| Dry bulk density               | b | Occasional tillage vs no-till                        | -6.9% [k]                                                                                                                                                     |
| Penetration resistance         | b | Occasional tillage vs no-till                        | -54.8% [k]                                                                                                                                                    |
| Macroporosity                  | b | Occasional tillage vs no-till                        | +45.4% [k]                                                                                                                                                    |
| Total porosity                 | b | Occasional tillage vs no-till                        | +10.6% [k]                                                                                                                                                    |
| SOC                            | b | Occasional tillage vs no-till                        | -4.7% [k]                                                                                                                                                     |
| Aggregate size (> 2 mm)        | b | Occasional tillage vs no-till                        | -12.5% [k]                                                                                                                                                    |
| MWD                            | b | Occasional tillage vs no-till                        | -10.7% [k]                                                                                                                                                    |
| pH                             | b | Occasional tillage vs no-till                        | ns [k]                                                                                                                                                        |
| P avail.                       | b | Occasional tillage vs no-till                        | ns [k]                                                                                                                                                        |
| MBC                            | b | Occasional tillage vs no-till                        | +21.2% [k]                                                                                                                                                    |
| Total microbial activity (TMA) | b | Occasional tillage vs no-till                        | ns [k]                                                                                                                                                        |
| Infiltration                   | b | Occasional tillage vs no-till                        | +120% [k]                                                                                                                                                     |
| Mulch cover                    | b | Occasional tillage vs no-till                        | -40.4% [k]                                                                                                                                                    |
| Runoff                         | b | Occasional tillage vs no-till                        | -26.1% [k]                                                                                                                                                    |
| Weeds                          | a | Occasional tillage vs no-till                        | -70% [k]                                                                                                                                                      |
| Runoff                         | b | Contour tillage vs traditional tillage (China)       | -35.86% [l]                                                                                                                                                   |
| Sediment transport             | b | Contour tillage vs traditional tillage (China)       | -49.02% [l]                                                                                                                                                   |
| SOC                            | b | No-till vs traditional tillage                       | Decreasing from ~10-15% to 0% with increasing humidity index (HI = mean annual precipitation divided by mean annual temperature) [m]                          |
| Yield                          | a | No-till vs traditional tillage                       | Decreasing from 0% with increasing humidity index (HI = mean annual precipitation divided by mean annual temperature), strongly linearly related with SOC [m] |
| Yield                          | a | Minimum tillage vs traditional tillage (fruit, Med.) | -8.3% ns [n]                                                                                                                                                  |
| Yield                          | a | No-till vs traditional tillage (fruit, Med.)         | +1.7% ns [n]                                                                                                                                                  |
| SOC                            | b | Minimum tillage vs traditional tillage (fruit, Med.) | +44.5% [n]                                                                                                                                                    |
| SOC                            | b | No-till vs traditional tillage (fruit, Med.)         | +38.3% [n]                                                                                                                                                    |
| C seq.                         | b | Minimum tillage vs traditional tillage (fruit, Med.) | 1.51 Mg C ha <sup>-1</sup> year <sup>-1</sup> , ns [n]                                                                                                        |
| C seq.                         | b | No-till vs traditional tillage (fruit, Med.)         | 1.39 Mg C ha <sup>-1</sup> year <sup>-1</sup> , ns [n]                                                                                                        |
| N tot.                         | b | Minimum tillage vs traditional tillage (fruit, Med.) | +34.4% [n]                                                                                                                                                    |
| N tot.                         | b | No-till vs traditional tillage (fruit, Med.)         | +26.4% ns [n]                                                                                                                                                 |
| P avail.                       | b | Minimum tillage vs traditional tillage (fruit, Med.) | +5.0% ns [n]                                                                                                                                                  |
| P avail.                       | b | No-till vs traditional tillage (fruit, Med.)         | +1.6% ns [n]                                                                                                                                                  |
| Yield (wheat)                  | a | Subsoiling vs traditional tillage (N. China)         | +16.3% [o]                                                                                                                                                    |
| Yield (maize)                  | a | Subsoiling vs traditional tillage (N. China)         | +9.2% [o]                                                                                                                                                     |
| Water consumption (wheat)      | c | Subsoiling vs traditional tillage (N. China)         | +8.4% [o]                                                                                                                                                     |
| Water consumption (maize)      | c | Subsoiling vs traditional tillage (N. China)         | +1.8% [o]                                                                                                                                                     |
| Bulk density                   | b | No-till vs traditional tillage                       | +2.3% [p]                                                                                                                                                     |
| Penetration resistance         | b | No-till vs traditional tillage                       | +27.8% [p]                                                                                                                                                    |
| pH                             | b | No-till vs traditional tillage                       | -1.8% [p]                                                                                                                                                     |
| MWD                            | b | No-till vs traditional tillage                       | +50% [p]                                                                                                                                                      |
| WSA                            | b | No-till vs traditional tillage                       | +36% [p]                                                                                                                                                      |
| Ksat                           | b | No-till vs traditional tillage                       | 0% [p]                                                                                                                                                        |
| AWC                            | b | No-till vs traditional tillage                       | +8.7% [p]                                                                                                                                                     |

|               |   |                                     |            |
|---------------|---|-------------------------------------|------------|
| Yield (maize) | a | Ridge-furrow cultivation vs control | 47% [q]    |
| WUE, ET       | c | Ridge-furrow cultivation vs control | 39%, 0 [q] |

---

[1] (Abdalla et al., 2016); [2] (Aguilera, Lassaletta, Gattinger, & Gimeno, 2013); [3] (Angers & Eriksen-Hamel, 2008); [4] (Bai et al., 2019b); [5] (T. M. Bowles, L. E. Jackson, M. Loeher, & T. R. Cavagnaro, 2016); [6] (Briones & Schmidt, 2017); [7] (Cooper et al., 2014); [8] (Daryanto et al., 2017); [9] (de Graaff, Hornslein, Throop, Kardol, & van Diepen, 2019); [10] (Elias, Wang, & Jacinthe, 2018); [11] (González-Sánchez, Ordóñez-Fernández, Carbonell-Bojollo, Veroz-González, & Gil-Ribes, 2012); [12] (Huang et al., 2018); [13] (Lee et al., 2019); [14] (M. Li, Wang, Guo, Yang, & Fu, 2019); [15] (S. Li et al., 2018); [16] (Y. Li, Li, Cui, Jagadamma, & Zhang, 2019); [17] *not used*; [18] (Z. Luo, Wang, & Sun, 2010); [19] (Mahal, Castellano, & Miguez, 2018); [20] (Manley, Van Kooten, Moeltner, & Johnson, 2005); [21] (Mei et al., 2018); [22] (Moos, Schrader, & Paulsen, 2017); [23] (C. M. Pittelkow et al., 2015); [24] (Cameron M. Pittelkow et al., 2015); [25] (Y. Sun, Zeng, Shi, Pan, & Huang, 2015); [26] (Ugarte, Kwon, Andrews, & Wander, 2014); [27] (Van den Putte et al., 2010); [28] (Velthof); [29] (Z. Du, Angers, Ren, Zhang, & Li, 2017); [30] (Feng et al., 2013); [31] (Morugán-Coronado et al., 2020); [32] (Wang, Zhang, Zhou, & Wang, 2018); [33] (Wei et al., 2017); [34] (C. Xu et al., 2017); [35] (Yin et al., 2018); [36] (Zhao et al., 2017); [37] (Zhao et al., 2016); [38] (Zhao et al., 2015); [a] (Kiran Kumara, Kandpal, & Pal, 2020); [b] (Bai et al., 2019a); [c] (Nunes, Karlen, Veum, Moorman, & Cambardella, 2020) their Table 2; [d] (Y. Zhang, Xie, Ni, & Zeng, 2020); [e] (Yüze Li et al., 2020); [f] (H. Chen et al., 2020); [g] (Rowen, Regan, Barbercheck, & Tooker, 2020); [h] (Jia et al., 2019); [i] (Y. Li, Zhang, Cai, Yang, & Chang, 2020); [j] (Mondal, Chakraborty, Bandyopadhyay, Aggarwal, & Rana, 2020); [k] (Peixoto et al., 2020); [l] (Jia, Zhao, Zhai, An, & Pereira, 2020); [m] (W. Sun et al., 2020); [n] (Morugán-Coronado et al., 2020); [o] (J. Wang et al., 2020); [p] (Y. Li, Li, Cui, & Zhang, 2020); [q] (Y. Wang et al., 2020)

<sup>1</sup>: N-losses: gaseous emission and leaching; \* GWP: yield-scaled global warming potential (CH<sub>4</sub> and N<sub>2</sub>O emissions per unit rice yield), \*\* EF<sub>ad</sub>: additional N<sub>2</sub>O emission factor, which is the conservation tillage-induced change in N<sub>2</sub>O emission compared to conventional tillage when N fertilizer is applied.\*\*\* BD: bul density, AWC: available water content, Ksat: saturated hydraulic conductivity, MWD: mean weight diameter, PR: penetration resistance of soil, WSA: water stable aggregates. MBC = microbial biomass c; MBN = microbial biomass N; Resp = soil respiration; Prot = soil protein; AC = active carbon; BG = beta-glucosidase, WSA = water stable aggregates, AWC = available water content, MWD = mean weight diameter

## 6. Pest management

**Table 6.** Pest management: effects on (a) crop yield and quality, (b) soil quality, (c) economic effects, (d) resource use efficiency, (e) environmental effects, and (f) human health impacts as reported in meta-analysis studies; aoi = area of interest.

| Parameter                                           | aoi | Management                    | Result                          |
|-----------------------------------------------------|-----|-------------------------------|---------------------------------|
| Yield                                               | a   | Effect of biofumigation       | Abs. diff.: 29% [a]             |
| Yield                                               | a   | Anaerobic soil disinfestation | Abs. diff.: 30% [b]             |
| Suppression of pathogens                            | a   | Anaerobic soil disinfestation | Abs. diff.: 70% [b]             |
| Yield                                               | a   | Organic / conventional        | Ratio: 0.83 [c]                 |
| Disease severity response by fungal plant pathogens | b   | Fertilized vs unfertilized    | increase $0.3 \pm 0.1$ [d]      |
| Nr studies with insect population                   | b   | Fertilisation                 | Increase/decrease 175/78 [e]    |
| Nr studies with pest population                     | b   | Organic /non-organic          | Increase/decrease 42/26e[f]     |
| Pest infestation; weed                              | e   | Organic vs conventional       | - hedge's $d=1.02 \pm 0.22$ [g] |
| Pest infestation; Animal pest                       |     |                               | ns [g]                          |
| Pest infestation; pathogen                          |     |                               | - hedge's $d=0.38 \pm 0.23$ [g] |

[a] (Morris, Fletcher, & Veresoglou, 2019); [b] (Shrestha, Augé, & Butler, 2016) [c] (Lesur-Dumoulin, Malézieux, Ben-Ari, Langlais, & Makowski, 2017); [d] (Veresoglou, Barto, Menexes, & Rillig, 2013) [e] (Butler, Garratt, & Leather, 2012); [f] (Garratt, Wright, & Leather, 2011); [g] (Muneret et al., 2018).

## 7. Weed management

**Table 7.** Weed management: effects on (a) crop yield and quality, (b) soil quality, (c) economic effects, (d) resource use efficiency, (e) environmental effects, and (f) human health impacts as reported in meta-analysis studies; aoi = area of interest.

| Parameter                                           | aoi | Management                                                       | Result                           |
|-----------------------------------------------------|-----|------------------------------------------------------------------|----------------------------------|
| weed biomass                                        | a   | Legume intercropping vs conventional, both non-weeded and weeded | -56%, -42% [a]                   |
| Weed density, biomass parasitic nematodes           | a   | Cover crops vs TT                                                | -10%, -5%, +29% [b]              |
| Number of studies with increase soil organic matter | b   | Reduced tillage/Tillage                                          | +40 and -7 out of 78 studies [c] |
| Soil microbial respiration                          | b   | Glyphosate vs no use, <10 mg kg                                  | Log RR: 0.064±0.126 [d]          |
| Soil microbial biomass                              |     | Glyphosate vs no use, >10 mg kg                                  | Log RR: 0.04±0.09 [d]            |

[a] (Verret et al., 2017); [b] (Daryanto et al., 2017); [c] (Govaerts et al., 2009); [d], (Nguyen, Rose, Rose, Morris, & Van Zwieten, 2016).

\*OA: organic agriculture

## 8. Crop residue management & mulching

**Table 8.** Crop residue management & mulching: effects on (a) crop yield and quality, (b) soil quality, (c) economic effects, (d) resource use efficiency, (e) environmental effects, and (f) human health impacts as reported in meta-analysis studies; aoi = area of interest.

| Parameter                                            | aoi  | Management                                           | Result                                                                                                 |
|------------------------------------------------------|------|------------------------------------------------------|--------------------------------------------------------------------------------------------------------|
| Yield, rotation                                      | a    | Residue vs control, overall                          | +1% ns,                                                                                                |
| Yield, no rotation                                   | a    | Residue vs control, overall, maize                   | +2% ns, 20% [f]                                                                                        |
| C microbial biomass                                  | b    | Amendment vs control                                 | +36% [a]                                                                                               |
| N <sub>2</sub> O emission factor                     | e    | Amendment vs control                                 | 0.5±0.3% [b]                                                                                           |
| N <sub>2</sub> O release                             | e    | Residue vs control (both include mineral fertilizer) | -11.7% [c]                                                                                             |
|                                                      |      | Residue vs control (both without mineral fertilizer) | 41.1% [c]                                                                                              |
|                                                      |      | Residue vs control (both upland soil)                | 23.5% [c]                                                                                              |
| N <sub>2</sub> O release                             | e    | Residue vs control                                   | sign. [d]                                                                                              |
| N <sub>2</sub> O release                             | e    | Residue vs control                                   | +11% [e]                                                                                               |
|                                                      | e    | Residue with C/N<25 vs control                       | +76% [e]                                                                                               |
| yield                                                | a    | Mulching plastic or straw in wheat vs conv           | 20%; 20% [g]                                                                                           |
| yield                                                | a    | Mulching plastic or straw in potato vs conv          | 61%; 20% [g]                                                                                           |
| NUE*                                                 | c    | Mulching plastic or straw in wheat vs conv           | 20%; 20% [g]                                                                                           |
| NUE*                                                 | c    | Mulching plastic or straw in maize vs conv           | 60%; 21% [g]                                                                                           |
| WUE**                                                | c    | Mulching plastic or straw in maize vs conv           | 20%; 20% [g]                                                                                           |
| WUE **                                               | c    | Mulching plastic or straw in potato vs conv          | 59%; 21% [g]                                                                                           |
| Yield                                                | a    | Mulching plastic or straw in maize vs conv           | 29.4%; 12.02% [s]                                                                                      |
| WUE                                                  | c    |                                                      | 29.45%; 11.43% [s]                                                                                     |
| Yield, WUE                                           | a,c  | Degradable film mulching vs none                     | +17%, +21% [h]                                                                                         |
| Yield, WUE                                           | a,c  | Crop residue vs none                                 | +5%, + 14.8 [l]                                                                                        |
| Yield                                                | a,b  | Degradable vs polyethylene mulching                  | ns [p]                                                                                                 |
| soil temperature                                     |      |                                                      | -4.5% [p]                                                                                              |
| Yield, WUE                                           | a,c  | Degradable vs polyethylene mulching                  | -3%, -3% [h]                                                                                           |
| yield                                                | a    | degradable vs polyethylene mulch                     | Ns. [q]                                                                                                |
| Yield wheat, maize                                   | a    | Mulching in NE China                                 | +14.9 ± 2.9%,<br>+17.7 ± 6.2% [k]                                                                      |
| Yield, water use, WP                                 | a, c | Plastic film mulching in NE China vs none            | +14, -2.8, +17.4% [m]                                                                                  |
|                                                      |      | Straw re-incorporation vs none                       | +8.5, -4.1, +12.6% [m]                                                                                 |
| Yield                                                | a    | Plastic mulching in potato, maize, wheat in China    | 25, 27, 20% [j]                                                                                        |
| Economic return                                      | d    |                                                      | 19, 29, 22% [j]                                                                                        |
| N footprint*                                         | e    |                                                      | 19, 37, 19% [j]                                                                                        |
| Grain yield maize                                    | a    | Plastic film mulching in loess plateau China         | +56.1% [k]                                                                                             |
| Yield potato                                         | a,   | Mulching plastic or straw in China vs conv           | 24.3%, 16% [r]                                                                                         |
| WUE                                                  | c    |                                                      | 287%, 5.6% [r]                                                                                         |
| SOC storage CH <sub>4</sub> emission                 | b,e  | Plastic mulching                                     | + 0.0102 Mg C ha <sup>-1</sup> y <sup>-1</sup> [i]<br>- 0.25 kg C ha <sup>-1</sup> y <sup>-1</sup> [i] |
| Yield                                                | a    | Crop residue retention vs none                       | +7.8% [n]                                                                                              |
| SOC,                                                 | b    |                                                      | 12-36.8% [n]                                                                                           |
| CO <sub>2</sub> , CH <sub>4</sub> , N <sub>2</sub> O | e    |                                                      | +31.7, +130.9, +12.2% [n]                                                                              |
| Soil C:N,                                            | b    | Living mulch in tree orchards in China               | n.s. [o]                                                                                               |
| Soil C:P                                             |      |                                                      | 12% [o]                                                                                                |
| soil N:P                                             |      |                                                      | 10% [o]                                                                                                |
| Yield                                                | a,e  | Optimal mulching & conservation (clean) vs           | +6.89% [q]                                                                                             |
| CO <sub>2</sub> emissions                            |      | conventional for whole China                         | -75% [q]                                                                                               |

[a] (Kallenbach & Grandy, 2011); [b] (Charles et al., 2017); [c] (Shan & Yan, 2013); [d] (Chen, Li, Hu, & Shi, 2013); [e] (Essich, Nkebiwe, Schneider, & Ruser, 2020); [f] (Cameron M. Pittelkow et al., 2015); [g] (Qin, Hu, & Oenema, 2015); [h] (Gu et al., 2020); [i] (Mo et al., 2020); [j] (L. Wang et al., 2020); [k] (N. Wang et al., 2020); [l] (X. Lu, 2020); [m] (H. Zheng et al., 2020); [n] (X. Zhao et al., 2020); [o] (G. Chen et al., 2020); [p] (Tofanelli & Wortman, 2020); [q] (Xiao, Zhao, & Zhang, 2020); [r] (Q. Li, Li, Zhang, Zhang, & Chen, 2018); [s] (Gao et al., 2019).

\*NUE: yield per unit of N \*\*WUE: yield per unit of water

## 9. Mechanization & technology

No meta-analysis studies/reviews found: no data (no table; no figure).

| Parameter                                    | aoi | Management                                                 | Result                                                                                                                                                                                                                                                                                                    |
|----------------------------------------------|-----|------------------------------------------------------------|-----------------------------------------------------------------------------------------------------------------------------------------------------------------------------------------------------------------------------------------------------------------------------------------------------------|
| Dry bulk density                             | b   | After trafficking versus before trafficking (forest soils) | 0-10 cm: for 98 studies; 76 showed increase, 22 showed decrease; 26 showed increase > 15% [a]<br><br>10-20 cm: for 102 studies; 76 showed increase, 26 showed decrease; 13 showed increase > 15% [a]<br><br>20-30 cm: for 88 studies; 57 showed increase, 31 showed decrease; 3 showed increase > 15% [a] |
| Labour input: preparation, weeding, total    | d   | Planting basins vs conventional tillage                    | +702%, +35%, +81 [b]                                                                                                                                                                                                                                                                                      |
| Labour input: preparation, weeding, total    | d   | Ridged systems vs conventional tillage                     | +19%, -44%, +9% [b]                                                                                                                                                                                                                                                                                       |
| Labour input: preparation, weeding, total    | d   | No-till vs conventional tillage                            | -83%, -90%, -25% [b]                                                                                                                                                                                                                                                                                      |
| Change in yield relative to change in labour | a/d | Planting basins vs conventional tillage                    | 0.16 (preparation), 0.66 (weeding) no data (total) [b]                                                                                                                                                                                                                                                    |
| Change in yield relative to change in labour | a/d | Ridged systems vs conventional tillage                     | 2.0 (preparation), 3.4 (weeding), 2.2 (total) [b]                                                                                                                                                                                                                                                         |
| Change in yield relative to change in labour | a/d | No-till vs conventional tillage                            | With herbicides: 1.7 (preparation), 2.6 (weeding), 1.8 (total) [b]<br>Manual weeding only: 3.3 (preparation), 0.6 (weeding), 0.9 (total) [b]                                                                                                                                                              |

[a] (Ampoorter, de Schrijver, van Nevel, Hermý, & Verheyen, 2012); [b] (Dahlin & Rusinamhodzi, 2019)

## 10. Landscape management

**Table 9.** Landscape management: effects on (a) crop yield and quality, (b) soil quality, (c) economic effects, (d) resource use efficiency, (e) environmental effects, and (f) human health impacts as reported in meta-analysis studies; aoi = area of interest.

| Parameter                                                                       | aoi | Management                                                                                                                                    | Result                                                                                                                   |
|---------------------------------------------------------------------------------|-----|-----------------------------------------------------------------------------------------------------------------------------------------------|--------------------------------------------------------------------------------------------------------------------------|
| Crop yield increase                                                             | a   | Wind breaks                                                                                                                                   | Spring wheat +8%, winter wheat +23%, barley +25%, oats +6%, rye +19%, millet +44%, corn +12%, alfalfa +99%, hay +20% [a] |
| Crop yield                                                                      | a   | Hedgerows vs control; next to hedge until twice the height; beyond twice the height until 20 times the height                                 | -29%, +6% [b]                                                                                                            |
| Soil organic matter in crop field                                               | b   | Hedgerows vs control                                                                                                                          | 6% [b]                                                                                                                   |
| Interception of N, P, suspended solids from soil surface flow                   | e   | Hedgerows                                                                                                                                     | 69%, 67%, 91% [b]                                                                                                        |
|                                                                                 |     | Grass strips                                                                                                                                  | 67%, 73%, 90% [b]                                                                                                        |
| Crop yield                                                                      | a   | Hedge rows, Flower strips vs none                                                                                                             | Ns [c]                                                                                                                   |
| Pest control                                                                    | e   | Hedge rows, Flower strips vs none                                                                                                             | ns, -16% [c]                                                                                                             |
| Pollination                                                                     | e   | Hedge rows, Flower strips vs none                                                                                                             | ns [c]                                                                                                                   |
| Abundance, richness of pollinators in crop                                      | e   | Flower strips vs none                                                                                                                         | ns, ns [d]                                                                                                               |
| Pollinator species richness                                                     | e   | effect of Agri-environment management in intensive land use, landscape:<br>Small, simple<br>Small, complex<br>Large, simple<br>Large, complex | Hedge's d:<br><br>sign. [f]<br>ns [f]<br>sign. [f]<br>Sign. [f]                                                          |
| Soil SOM, total N, total P, alkali N, available P, readily available K, total K | b   | hedge rows vs none                                                                                                                            | Hedge's d sign. [c]                                                                                                      |
|                                                                                 |     |                                                                                                                                               | Hedge's d ns [c]                                                                                                         |

[a] (Kort, 1988); [b] (Van Vooren et al., 2017); [c] (Albrecht et al., 2020); [d] (Zamorano, Bartomeus, Grez, & Garibaldi, 2020); [e] (Y. Zheng, Wang, Qin, & Wang, 2020); [f] (Marja et al., 2019).



## Brief description Excel file

While collecting the data, additional meta-information was summarized in an Excel table, which is available as a separate document (LINK). In that table additional information can be found of non-meta-analysis studies as well. The meta-information that was collected (as far as provided by the original studies) is given in Table 10.

**Table 10.** Explanation of the main columns in the accompanying Excel-sheet.

| Column header                    | Explanation                                                                                                                                         |
|----------------------------------|-----------------------------------------------------------------------------------------------------------------------------------------------------|
| SICS impact on                   | Impact on either a) Agronomic effects, b) Soil quality & soil health, c) Resource use efficiency, d) Economic aspects, or e) Environmental impacts. |
| Reference                        | Reference.                                                                                                                                          |
| Country                          | Indication whether the data refer to a global analysis or more specifically to a smaller region or country.                                         |
| Type of study                    | Meta-analysis, review, review (single study), single study.                                                                                         |
| Short description                | Brief description of the contents of the study.                                                                                                     |
| Parameter                        | Name of variable for which the effect size is provided.                                                                                             |
| Crop                             | Name of crop studied (if provided).                                                                                                                 |
| Soil                             | Soil type (not always available).                                                                                                                   |
| Year(s)                          | Years from which data were collected.                                                                                                               |
| Depth                            | Soil depth to which variable refers to (if provided).                                                                                               |
| Control_description              | Description of control treatment.                                                                                                                   |
| Treatment_description            | Description of the treatment under investigation.                                                                                                   |
| Unit                             | Unit of the variable.                                                                                                                               |
| Control_data                     | Quantity of the variable for the control treatment.                                                                                                 |
| Treatment_data                   | Quantity of the variable for the treatment under investigation.                                                                                     |
| Absolute difference              | $\text{Treatment\_data} - \text{Control\_data}$                                                                                                     |
| Factor                           | $\text{Treatment\_data} / \text{Control\_data}$                                                                                                     |
| Relative change                  | $\text{Treatment\_data} / \text{Control\_data} - 1$                                                                                                 |
| L                                | $\text{LN}(\text{Treatment\_data} / \text{Control\_data})$                                                                                          |
| Significant according to authors | Indication if authors provided information on significance of their findings.                                                                       |

In some cases only the final relative effect size (Factor, Relative change or L) was provided. In other cases only the absolute values for control and treatment were given, from which we calculated the relative effect size information. In rare cases only the absolute difference (without reference) was given, so that no relative effect size could be computed. For a few studies this Excel sheet contains, besides the reported main effects, also effects split in sub-effects; for example, effects split for arid versus humid regions, effects split for different soil types, or effects split for different crops. It goes beyond the scope of our study to provide all full details of the underlying meta-analysis studies.

## References used in Supplemental Information

- Abdalla, K., Chivenge, P., Ciais, P., & Chaplot, V. (2016). No-tillage lessens soil CO<sub>2</sub> emissions the most under arid and sandy soil conditions: Results from a meta-analysis. *Biogeosciences*, 13(12), 3619-3633. doi:10.5194/bg-13-3619-2016
- Adu, M. O., Yawson, D. O., Abano, E. E., Asare, P. A., Armah, F. A., & Opoku, E. K. (2019). Does water-saving irrigation improve the quality of fruits and vegetables? Evidence from meta-analysis. *Irrigation Science*, 37(6), 669-690. doi:10.1007/s00271-019-00646-2
- Adu, M. O., Yawson, D. O., Armah, F. A., Asare, P. A., & Frimpong, K. A. (2018). Meta-analysis of crop yields of full, deficit, and partial root-zone drying irrigation. *Agricultural Water Management*, 197, 79-90. doi:10.1016/j.agwat.2017.11.019
- Aguilera, E., Lassaletta, L., Gattinger, A., & Gimeno, B. S. (2013). Managing soil carbon for climate change mitigation and adaptation in Mediterranean cropping systems: A meta-analysis. *Agriculture, Ecosystems and Environment*, 168, 25-36. doi:10.1016/j.agee.2013.02.003
- Albrecht, M., Kleijn, D., Williams, N. M., Tschumi, M., Blaauw, B. R., Bommarco, R., . . . Entling, M. H. (2020). The effectiveness of flower strips and hedgerows on pest control, pollination services and crop yield: a quantitative synthesis. *Ecology letters*, 23(10), 1488-1498.
- Amenumey, S., Sands, G., Wilson, B., Mulla, D., Nieber, J., & Swenson, J. (2009). *Meta-analysis as a statistical tool for evaluating the hydrologic effects of water table management*. Paper presented at the American Society of Agricultural and Biological Engineers Annual International Meeting 2009, ASABE 2009.
- Ampoorter, E., de Schrijver, A., van Nevel, L., Hermy, M., & Verheyen, K. (2012). Impact of mechanized harvesting on compaction of sandy and clayey forest soils: results of a meta-analysis. *Annals of Forest Science*, 69(5), 533-542. doi:10.1007/s13595-012-0199-y
- Angers, D. A., & Eriksen-Hamel, N. S. (2008). Full-Inversion Tillage and Organic Carbon Distribution in Soil Profiles: A Meta-Analysis. *Soil Science Society of America Journal*, 72(5), 1370-1374. doi:10.2136/sssaj2007.0342
- Angus, J. F., Kirkegaard, J. A., Hunt, J. R., Ryan, M. H., Ohlander, L., & Peoples, M. B. (2015). Break crops and rotations for wheat. *Crop and Pasture Science*, 66(6), 523-552. doi:10.1071/cp14252
- Bai, X., Huang, Y., Ren, W., Coyne, M., Jacinthe, P. A., Tao, B., . . . Matocha, C. (2019a). Responses of soil carbon sequestration to climate-smart agriculture practices: A meta-analysis. *Glob Chang Biol*, 25(8), 2591-2606. doi:10.1111/gcb.14658
- Bai, X., Huang, Y., Ren, W., Coyne, M., Jacinthe, P. A., Tao, B., . . . Matocha, C. (2019b). Responses of soil carbon sequestration to climate-smart agriculture practices: A meta-analysis. *Global Change Biology*, 25(8), 2591-2606. doi:10.1111/gcb.14658
- Basche, A. D., & DeLonge, M. S. (2019). Comparing infiltration rates in soils managed with conventional and alternative farming methods: A meta-analysis. *PLoS One*, 14(9). doi:10.1371/journal.pone.0215702
- Bedoussac, L., Journet, E. P., Hauggaard-Nielsen, H., Naudin, C., Corre-Hellou, G., Jensen, E. S., . . . Justes, E. (2015). Ecological principles underlying the increase of productivity achieved by cereal-grain legume intercrops in organic farming. A review. *Agronomy for sustainable development*, 35(3), 911-935. doi:10.1007/s13593-014-0277-7
- Borchard, N., Schirrmann, M., Cayuela, M. L., Kammann, C., Wrage-Mönnig, N., Estavillo, J. M., . . . Ippolito, J. A. (2019). Biochar, soil and land-use interactions that reduce nitrate leaching and N<sub>2</sub>O emissions: a meta-analysis. *Science of the Total Environment*, 651, 2354-2364.
- Bowles, T. M., Jackson, L. E., Loehrer, M., & Cavagnaro, T. R. (2016). Ecological intensification and arbuscular mycorrhizas: a meta-analysis of tillage and cover crop effects. *Journal of Applied Ecology*, n/a-n/a. doi:10.1111/1365-2664.12815
- Bowles, T. M., Jackson, L. E., Loehrer, M., & Cavagnaro, T. R. (2016). Ecological intensification and arbuscular mycorrhizas: a meta-analysis of tillage and cover crop effects. *Journal of Applied Ecology*, 54(6), 1785-1793. doi:10.1111/1365-2664.12815
- Briones, M. J. I., & Schmidt, O. (2017). Conventional tillage decreases the abundance and biomass of earthworms and alters their community structure in a global meta-analysis. *Global change biology*, 23(10), 4396-4419. doi:10.1111/gcb.13744
- Butler, J., Garratt, M. P. D., & Leather, S. R. (2012). Fertilisers and insect herbivores: a meta-analysis. *Annals of Applied Biology*, 161(3), 223-233. doi:10.1111/j.1744-7348.2012.00567.x
- Cayuela, M. L., Aguilera, E., Sanz-Cobena, A., Adams, D. C., Abalos, D., Barton, L., . . . Lassaletta, L. (2016). Direct nitrous oxide emissions in Mediterranean climate cropping systems: Emission factors based on a meta-analysis of available measurement data. *Agriculture, Ecosystems and Environment*. doi:10.1016/j.agee.2016.10.006
- Charles, A., Rochette, P., Whalen, J. K., Angers, D. A., Chantigny, M. H., & Bertrand, N. (2017). Global nitrous oxide emission factors from agricultural soils after addition of organic amendments: A meta-analysis. *Agriculture, Ecosystems and Environment*, 236, 88-98. doi:10.1016/j.agee.2016.11.021
- Chen, G., Liu, S., Xiang, Y., Tang, X., Liu, H., Yao, B., & Luo, X. (2020). Impact of living mulch on soil C:N:P stoichiometry in orchards across China: A meta-analysis examining climatic, edaphic, and biotic dependency. *Pedosphere*, 30(2), 181-189. doi:10.1016/S1002-0160(20)60003-0
- Chen, H., Dai, Z., Veach, A. M., Zheng, J., Xu, J., & Schadt, C. W. (2020). Global meta-analyses show that conservation tillage practices promote soil fungal and bacterial biomass. *Agriculture, Ecosystems & Environment*, 293. doi:10.1016/j.agee.2020.106841
- Chen, H., Li, X., Hu, F., & Shi, W. (2013). Soil nitrous oxide emissions following crop residue addition: A meta-analysis. *Global change biology*, 19(10), 2956-2964. doi:10.1111/gcb.12274

- Christianson, L., Tyndall, J., & Helmers, M. (2013). Financial comparison of seven nitrate reduction strategies for Midwestern agricultural drainage. *Water Resources and Economics*, 2-3, 30-56. doi:10.1016/j.wre.2013.09.001
- Cooper, J. M., Baranski, M., Nobel De Lange, M., Barberi, P., Fliessbach, A., Peigne, J., . . . Mäder, P. (2014). *Effects of reduced tillage in organic farming on yield, weeds and soil carbon: Metaanalysis results from the TILMAN-ORG project*.
- Dahlin, A. S., & Rusinamhodzi, L. (2019). Yield and labor relations of sustainable intensification options for smallholder farmers in sub-Saharan Africa. A meta-analysis. *Agronomy for Sustainable Development*, 39(3). doi:10.1007/s13593-019-0575-1
- Daryanto, S., Wang, L., & Jacinthe, P. A. (2017). Meta-analysis of phosphorus loss from no-till soils. *Journal of Environmental Quality*, 46(5), 1028-1037. doi:10.2134/jeq2017.03.0121
- Dassou, A. G., & Tixier, P. (2016). Response of pest control by generalist predators to local-scale plant diversity: A meta-analysis. *Ecology and Evolution*, 6(4), 1143-1153. doi:10.1002/ece3.1917
- de Graaff, M. A., Hornslein, N., Throop, H. L., Kardol, P., & van Diepen, L. T. A. (2019) Effects of agricultural intensification on soil biodiversity and implications for ecosystem functioning: A meta-analysis. In: Vol. 155. *Advances in Agronomy* (pp. 1-44).
- de Paul Obade, V., & Lal, R. (2014). Using meta-analyses to assess pedo-variability under different land uses and soil management in central Ohio, USA. *Geoderma*, 232-234, 56-68. doi:10.1016/j.geoderma.2014.04.030
- Du, Y.-D., Niu, W.-Q., Gu, X.-B., Zhang, Q., Cui, B.-J., & Zhao, Y. (2018). Crop yield and water use efficiency under aerated irrigation: A meta-analysis. *Agricultural Water Management*, 210, 158-164. doi:10.1016/j.agwat.2018.07.038
- Du, Y., Cui, B., Zhang, Q., Wang, Z., Sun, J., & Niu, W. (2020). Effects of manure fertilizer on crop yield and soil properties in China: A meta-analysis. *Catena*, 193. doi:10.1016/j.catena.2020.104617
- Du, Z., Angers, D. A., Ren, T., Zhang, Q., & Li, G. (2017). The effect of no-till on organic C storage in Chinese soils should not be overemphasized: A meta-analysis. *Agriculture, Ecosystems and Environment*, 236, 1-11. doi:10.1016/j.agee.2016.11.007
- Eden, M., Gerke, H. H., & Houot, S. (2017). Organic waste recycling in agriculture and related effects on soil water retention and plant available water: a review. *Agronomy for sustainable development*, 37(2), 11.
- Elias, D., Wang, L., & Jacinthe, P. A. (2018). A meta-analysis of pesticide loss in runoff under conventional tillage and no-till management. *Environmental Monitoring and Assessment*, 190(2). doi:10.1007/s10661-017-6441-1
- Emmerling, C., Krein, A., & Junk, J. (2020). Meta-analysis of strategies to reduce NH<sub>3</sub> emissions from slurries in European agriculture and consequences for greenhouse gas emissions. *Agronomy*, 10(11). doi:10.3390/agronomy10111633
- Essich, L., Nkebiwe, P. M., Schneider, M., & Ruser, R. (2020). Is crop residue removal to reduce n<sub>2</sub>o emissions driven by quality or quantity? A field study and meta-analysis. *Agriculture (Switzerland)*, 10(11), 1-20. doi:10.3390/agriculture10110546
- Fan, Y., Wang, C., & Nan, Z. (2018). Determining water use efficiency of wheat and cotton: A meta-regression analysis. *Agricultural Water Management*, 199, 48-60. doi:10.1016/j.agwat.2017.12.006
- Feng, J., Chen, C., Zhang, Y., Song, Z., Deng, A., Zheng, C., & Zhang, W. (2013). Impacts of cropping practices on yield-scaled greenhouse gas emissions from rice fields in China: A meta-analysis. *Agriculture, Ecosystems and Environment*, 164, 220-228. doi:10.1016/j.agee.2012.10.009
- Fernandez, J. A., DeBruin, J., Messina, C. D., & Ciampitti, I. A. (2019). Late-season nitrogen fertilization on maize yield: A meta-analysis. *Field Crops Research*. doi:10.1016/j.fcr.2019.107586
- Gao, H., Yan, C., Liu, Q., Li, Z., Yang, X., & Qi, R. (2019). Exploring optimal soil mulching to enhance yield and water use efficiency in maize cropping in China: A meta-analysis. *Agricultural Water Management*, 225. doi:10.1016/j.agwat.2019.105741
- Garratt, M. P. D., Wright, D. J., & Leather, S. R. (2011). The effects of farming system and fertilisers on pests and natural enemies: A synthesis of current research. *Agriculture, Ecosystems and Environment*, 141(3-4), 261-270. doi:10.1016/j.agee.2011.03.014
- Geisseler, D., & Scow, K. M. (2014). Long-term effects of mineral fertilizers on soil microorganisms—A review. *Soil Biology and Biochemistry*, 75, 54-63.
- González-Sánchez, E. J., Ordóñez-Fernández, R., Carbonell-Bojollo, R., Veroz-González, O., & Gil-Ribes, J. A. (2012). Meta-analysis on atmospheric carbon capture in Spain through the use of conservation agriculture. *Soil and Tillage Research*, 122, 52-60. doi:10.1016/j.still.2012.03.001
- Govaerts, B., Verhulst, N., Castellanos-Navarrete, A., Sayre, K. D., Dixon, J., & Dendooven, L. (2009). Conservation Agriculture and Soil Carbon Sequestration: Between Myth and Farmer Reality. *Critical Reviews in Plant Sciences*, 28(3), 97-122. doi:10.1080/07352680902776358
- Gu, X., Cai, H., Fang, H., Li, Y., Chen, P., & Li, Y. (2020). Effects of degradable film mulching on crop yield and water use efficiency in China: A meta-analysis. *Soil and Tillage Research*, 202. doi:10.1016/j.still.2020.104676
- Han, Z., Walter, M. T., & Drinkwater, L. E. (2017). N<sub>2</sub>O emissions from grain cropping systems: a meta-analysis of the impacts of fertilizer-based and ecologically-based nutrient management strategies. *Nutrient Cycling in Agroecosystems*, 107(3), 335-355.
- He, G., Wang, Z., & Cui, Z. (2020). Managing irrigation water for sustainable rice production in China. *Journal of Cleaner Production*, 245. doi:10.1016/j.jclepro.2019.118928
- He, M., Zhou, G., Yuan, T., van Groenigen, K. J., Shao, J., & Zhou, X. (2020). Grazing intensity significantly changes the C : N : P stoichiometry in grassland ecosystems. *Global Ecology and Biogeography*, 29(2), 355-369. doi:10.1111/geb.13028

- Hijbeek, R., van Ittersum, M. K., ten Berge, H. F. M., Gort, G., Spiegel, H., & Whitmore, A. P. (2017). Do organic inputs matter – a meta-analysis of additional yield effects for arable crops in Europe. *Plant and Soil*, 411(1-2), 293-303. doi:10.1007/s11104-016-3031-x
- Huang, Y., Ren, W., Wang, L., Hui, D., Grove, J. H., Yang, X., . . . Goff, B. (2018). Greenhouse gas emissions and crop yield in no-tillage systems: A meta-analysis. *Agriculture, Ecosystems and Environment*, 268, 144-153. doi:10.1016/j.agee.2018.09.002
- Jaggard, K. W., Qi, A., & Armstrong, M. J. (2009). A meta-analysis of sugarbeet yield responses to nitrogen fertilizer measured in England since 1980. *Journal of Agricultural Science*, 147(3), 287-301. doi:10.1017/S0021859609008478
- Jia, L., Zhao, W., Fu, B., Daryanto, S., Wang, S., Liu, Y., & Zhai, R. (2019). Effects of minimum soil disturbance practices on controlling water erosion in China's slope farmland: A meta-analysis. *Land Degradation & Development*, 30(6), 706-716. doi:10.1002/ldr.3258
- Jia, L., Zhao, W., Zhai, R., An, Y., & Pereira, P. (2020). Quantifying the effects of contour tillage in controlling water erosion in China: A meta-analysis. *Catena*, 195. doi:10.1016/j.catena.2020.104829
- Jian, J., Lester, B. J., Du, X., Reiter, M. S., & Stewart, R. D. (2020). A calculator to quantify cover crop effects on soil health and productivity. *Soil and Tillage Research*, 199. doi:10.1016/j.still.2020.104575
- Jian, S., Li, J., Chen, J., Wang, G., Mayes, M. A., Dzantor, K. E., . . . Luo, Y. (2016). Soil extracellular enzyme activities, soil carbon and nitrogen storage under nitrogen fertilization: A meta-analysis. *Soil Biology and Biochemistry*, 101, 32-43. doi:10.1016/j.soilbio.2016.07.003
- Jiang, Y., Carrijo, D., Huang, S., Chen, J., Balaine, N., Zhang, W., . . . Linquist, B. (2019). Water management to mitigate the global warming potential of rice systems: A global meta-analysis. *Field Crops Research*, 234, 47-54. doi:10.1016/j.fcr.2019.02.010
- Kallenbach, C., & Grandy, A. S. (2011). Controls over soil microbial biomass responses to carbon amendments in agricultural systems: A meta-analysis. *Agriculture, Ecosystems and Environment*, 144(1), 241-252. doi:10.1016/j.agee.2011.08.020
- Kiran Kumara, T. M., Kandpal, A., & Pal, S. (2020). A meta-analysis of economic and environmental benefits of conservation agriculture in South Asia. *J Environ Manage*, 269, 110773. doi:10.1016/j.jenvman.2020.110773
- Kort, J. (1988). 9. Benefits of windbreaks to field and forage crops. *Agriculture, Ecosystems and Environment*, 22-23(C), 165-190. doi:10.1016/0167-8809(88)90017-5
- Lee, H., Lautenbach, S., Nieto, A. P. G., Bondeau, A., Cramer, W., & Geijzendorffer, I. R. (2019). The impact of conservation farming practices on Mediterranean agro-ecosystem services provisioning—a meta-analysis. *Regional Environmental Change*, 19(8), 2187-2202. doi:10.1007/s10113-018-1447-y
- Lesur-Dumoulin, C., Malézieux, E., Ben-Ari, T., Langlais, C., & Makowski, D. (2017). Lower average yields but similar yield variability in organic versus conventional horticulture. A meta-analysis. *Agronomy for sustainable development*, 37(5). doi:10.1007/s13593-017-0455-5
- Li, C., Hoffland, E., Kuyper, T. W., Yu, Y., Zhang, C., Li, H., . . . van der Werf, W. (2020). Syndromes of production in intercropping impact yield gains. *Nature Plants*, 6(6), 653-660. doi:10.1038/s41477-020-0680-9
- Li, M., Wang, J., Guo, D., Yang, R., & Fu, H. (2019). Effect of land management practices on the concentration of dissolved organic matter in soil: A meta-analysis. *Geoderma*, 344, 74-81. doi:10.1016/j.geoderma.2019.03.004
- Li, Q., Li, H., Zhang, L., Zhang, S., & Chen, Y. (2018). Mulching improves yield and water-use efficiency of potato cropping in China: A meta-analysis. *Field Crops Research*, 221, 50-60. doi:10.1016/j.fcr.2018.02.017
- Li, S., Zheng, X., Liu, C., Yao, Z., Zhang, W., & Han, S. (2018). Influences of observation method, season, soil depth, land use and management practice on soil dissolvable organic carbon concentrations: A meta-analysis. *Science of the Total Environment*, 631-632, 105-114. doi:10.1016/j.scitotenv.2018.02.238
- Li, W., Yang, M., Wang, J., Wang, Z., Fan, Z., Kang, F., . . . Zhang, Y. (2020). Agronomic responses of major fruit crops to fertilization in China: A meta-analysis. *Agronomy*, 10(1). doi:10.3390/agronomy10010015
- Li, Y., Cui, S., Chang, S. X., & Zhang, Q. (2019). Liming effects on soil pH and crop yield depend on lime material type, application method and rate, and crop species: a global meta-analysis. *Journal of Soils and Sediments*, 19(3), 1393-1406. doi:10.1007/s11368-018-2120-2
- Li, Y., Li, Z., Cui, S., Chang, S. X., Jia, C., & Zhang, Q. (2019). A global synthesis of the effect of water and nitrogen input on maize (*Zea mays*) yield, water productivity and nitrogen use efficiency. *Agricultural and Forest Meteorology*, 268, 136-145. doi:10.1016/j.agrformet.2019.01.018
- Li, Y., Li, Z., Cui, S., Jagadamma, S., & Zhang, Q. (2019). Residue retention and minimum tillage improve physical environment of the soil in croplands: A global meta-analysis. *Soil and Tillage Research*, 194. doi:10.1016/j.still.2019.06.009
- Li, Y., Li, Z., Cui, S., & Zhang, Q. (2020). Trade-off between soil pH, bulk density and other soil physical properties under global no-tillage agriculture. *Geoderma*, 361. doi:10.1016/j.geoderma.2019.114099
- Li, Y., Song, D., Liang, S., Dang, P., Qin, X., Liao, Y., & Siddique, K. H. M. (2020). Effect of no-tillage on soil bacterial and fungal community diversity: A meta-analysis. *Soil and Tillage Research*, 204. doi:10.1016/j.still.2020.104721
- Li, Y., Zhang, Q., Cai, Y., Yang, Q., & Chang, S. X. (2020). Minimum tillage and residue retention increase soil microbial population size and diversity: Implications for conservation tillage. *Sci Total Environ*, 716, 137164. doi:10.1016/j.scitotenv.2020.137164
- Liu, B.-Y., Zhao, X., Li, S.-S., Zhang, X.-Z., Virk, A. L., Qi, J.-Y., . . . Zhang, H.-L. (2020). Meta-analysis of management-induced changes in nitrogen use efficiency of winter wheat in the North China Plain. *Journal of Cleaner Production*, 251. doi:10.1016/j.jclepro.2019.119632

- Liu, S., Lin, F., Wu, S., Ji, C., Sun, Y., Jin, Y., . . . Zou, J. (2017). A meta-analysis of fertilizer-induced soil NO and combined NO+N<math>\leq 2</math>O emissions. *Global change biology*, 23(6), 2520-2532. doi:10.1111/gcb.13485
- Liu, S., Wang, J., Pu, S., Blagodatskaya, E., Kuzyakov, Y., & Razavi, B. S. (2020). Impact of manure on soil biochemical properties: A global synthesis. *Science of the Total Environment*, 745. doi:10.1016/j.scitotenv.2020.141003
- Lori, M., Symnack, S., Mäder, P., De Deyn, G., & Gattinger, A. (2017). Organic farming enhances soil microbial abundance and activity—A meta-analysis and meta-Regression. *PLoS One*, 12(7). doi:10.1371/journal.pone.0180442
- Lu, J., Shao, G., Cui, J., Wang, X., & Keabetswe, L. (2019). Yield, fruit quality and water use efficiency of tomato for processing under regulated deficit irrigation: A meta-analysis. *Agricultural Water Management*, 222, 301-312. doi:10.1016/j.agwat.2019.06.008
- Lu, X. (2020). A meta-analysis of the effects of crop residue return on crop yields and water use efficiency. *PLoS ONE*, 15(4). doi:10.1371/journal.pone.0231740
- Luo, G., Li, L., Friman, V. P., Guo, J., Guo, S., Shen, Q., & Ling, N. (2018). Organic amendments increase crop yields by improving microbe-mediated soil functioning of agroecosystems: A meta-analysis. *Soil Biology and Biochemistry*, 124, 105-115. doi:10.1016/j.soilbio.2018.06.002
- Luo, Z., Wang, E., & Sun, O. J. (2010). Can no-tillage stimulate carbon sequestration in agricultural soils? A meta-analysis of paired experiments. *Agriculture, Ecosystems and Environment*, 139(1-2), 224-231. doi:10.1016/j.agee.2010.08.006
- Mahal, N. K., Castellano, M. J., & Miguez, F. E. (2018). Conservation agriculture practices increase potentially mineralizable nitrogen: A meta-analysis. *Soil Science Society of America Journal*, 82(5), 1270-1278. doi:10.2136/sssaj2017.07.0245
- Manley, J., Van Kooten, G. C., Moeltner, K., & Johnson, D. W. (2005). Creating carbon offsets in agriculture through no-till cultivation: A meta-analysis of costs and carbon benefits. *Climatic Change*, 68(1-2), 41-65. doi:10.1007/s10584-005-6010-4
- Marja, R., Kleijn, D., Tschardt, T., Klein, A. M., Frank, T., & Batáry, P. (2019). Effectiveness of agri-environmental management on pollinators is moderated more by ecological contrast than by landscape structure or land-use intensity. *Ecology Letters*, 22(9), 1493-1500. doi:10.1111/ele.13339
- McDaniel, M., Tiemann, L., & Grandy, A. (2014). Does agricultural crop diversity enhance soil microbial biomass and organic matter dynamics? A meta-analysis. *Ecological Applications*, 24(3), 560-570.
- Mei, K., Wang, Z., Huang, H., Zhang, C., Shang, X., Dahlgren, R. A., . . . Xia, F. (2018). Stimulation of N<math>\leq 2</math>O emission by conservation tillage management in agricultural lands: A meta-analysis. *Soil and Tillage Research*, 182, 86-93. doi:10.1016/j.still.2018.05.006
- Miguez, F. E., & Bollero, G. A. (2005). Review of corn yield response under winter cover cropping systems using meta-analytic methods. *Crop Science*, 45(6), 2318-2329. doi:10.2135/cropsci2005.0014
- Mitchell-McCallister, D., Cano, A., & West, C. (2020). Meta-analysis of crop water use efficiency by irrigation system in the Texas High Plains. *Irrigation Science*, 38(5-6), 535-546. doi:10.1007/s00271-020-00696-x
- Mo, F., Yu, K. L., Crowther, T. W., Wang, J. Y., Zhao, H., Xiong, Y. C., & Liao, Y. C. (2020). How plastic mulching affects net primary productivity, soil C fluxes and organic carbon balance in dry agroecosystems in China. *Journal of Cleaner Production*, 263. doi:10.1016/j.jclepro.2020.121470
- Mondal, S., Chakraborty, D., Bandyopadhyay, K., Aggarwal, P., & Rana, D. S. (2020). A global analysis of the impact of zero-tillage on soil physical condition, organic carbon content, and plant root response. *Land Degradation & Development*, 31(5), 557-567. doi:10.1002/ldr.3470
- Moos, J. H., Schrader, S., & Paulsen, H. M. (2017). Reduced tillage enhances earthworm abundance and biomass in organic farming: A meta-analysis. *Landbauforschung*, 67(3-4), 123-128. doi:10.3220/LBF1512114926000
- Morris, E. K., Fletcher, R., & Veresoglou, S. D. (2019). Effective methods of biofumigation: a meta-analysis. *Plant and Soil*. doi:10.1007/s11104-019-04352-y
- Morugán-Coronado, A., Linares, C., Gómez-López, M. D., Faz, Á., & Zornoza, R. (2020). The impact of intercropping, tillage and fertilizer type on soil and crop yield in fruit orchards under Mediterranean conditions: A meta-analysis of field studies. *Agricultural Systems*, 178. doi:10.1016/j.agsy.2019.102736
- Muneret, L., Mitchell, M., Seufert, V., Aviron, S., Djoudi, E. A., Pétilion, J., . . . Rusch, A. (2018). Evidence that organic farming promotes pest control. *Nature Sustainability*, 1(7), 361-368. doi:10.1038/s41893-018-0102-4
- Nguyen, D. B., Rose, M. T., Rose, T. J., Morris, S. G., & Van Zwieten, L. (2016). Impact of glyphosate on soil microbial biomass and respiration: a meta-analysis. *Soil Biology and Biochemistry*, 92, 50-57.
- Nichols, V., Martinez-Feria, R., Weisberger, D., Carlson, S., Basso, B., & Basche, A. (2020). Cover crops and weed suppression in the U.S. Midwest: A meta-analysis and modeling study. *Agricultural and Environmental Letters*, 5(1). doi:10.1002/acl.20022
- Nkebiwe, P. M., Weinmann, M., Bar-Tal, A., & Müller, T. (2016). Fertilizer placement to improve crop nutrient acquisition and yield: A review and meta-analysis. *Field Crops Research*, 196, 389-401. doi:10.1016/j.fcr.2016.07.018
- Nunes, M. R., Karlen, D. L., Veum, K. S., Moorman, T. B., & Cambardella, C. A. (2020). Biological soil health indicators respond to tillage intensity: A US meta-analysis. *Geoderma*, 369. doi:10.1016/j.geoderma.2020.114335
- Peixoto, D. S., Silva, L., Melo, L. B. B., Azevedo, R. P., Araujo, B. C. L., Carvalho, T. S., . . . Silva, B. M. (2020). Occasional tillage in no-tillage systems: A global meta-analysis. *Sci Total Environ*, 745, 140887. doi:10.1016/j.scitotenv.2020.140887

- Pittelkow, C. M., Liang, X., Linquist, B. A., van Groenigen, K. J., Lee, J., Lundy, M. E., . . . van Kessel, C. (2015). Productivity limits and potentials of the principles of conservation agriculture. *Nature*, 517(7534), 365-368. doi:10.1038/nature13809
- Pittelkow, C. M., Linquist, B. A., Lundy, M. E., Liang, X., van Groenigen, K. J., Lee, J., . . . van Kessel, C. (2015). When does no-till yield more? A global meta-analysis. *Field Crops Research*, 183, 156-168. doi:10.1016/j.fcr.2015.07.020
- Poeplau, C., & Don, A. (2014). Soil carbon changes under *Miscanthus* driven by C4 accumulation and C3 decomposition - toward a default sequestration function. *GCB Bioenergy*, 6(4), 327-338. doi:10.1111/gcbb.12043
- Poeplau, C., & Don, A. (2015). Carbon sequestration in agricultural soils via cultivation of cover crops - A meta-analysis. *Agriculture, Ecosystems and Environment*, 200, 33-41. doi:10.1016/j.agee.2014.10.024
- Preissel, S., Reckling, M., Schläpke, N., & Zander, P. (2015). Magnitude and farm-economic value of grain legume pre-crop benefits in Europe: A review. *Field Crops Research*, 175, 64-79. doi:10.1016/j.fcr.2015.01.012
- Qin, W., Assinck, F. B. T., Heinen, M., & Oenema, O. (2016). Water and nitrogen use efficiencies in citrus production: A meta-analysis. *Agriculture, Ecosystems and Environment*, 222, 103-111. doi:10.1016/j.agee.2016.01.052
- Qin, W., Hu, C., & Oenema, O. (2015). Soil mulching significantly enhances yields and water and nitrogen use efficiencies of maize and wheat: A meta-analysis. *Scientific Reports*, 5. doi:10.1038/srep16210
- Quemada, M., Baranski, M., Nobel-de Lange, M. N. J., Vallejo, A., & Cooper, J. M. (2013). Meta-analysis of strategies to control nitrate leaching in irrigated agricultural systems and their effects on crop yield. *Agriculture, Ecosystems and Environment*, 174, 1-10. doi:10.1016/j.agee.2013.04.018
- Quinn, D. J., Lee, C. D., & Poffenbarger, H. J. (2020). Corn yield response to sub-surface banded starter fertilizer in the U.S.: A meta-analysis. *Field Crops Research*, 254. doi:10.1016/j.fcr.2020.107834
- Rowen, E. K., Regan, K. H., Barbercheck, M. E., & Tooker, J. F. (2020). Is tillage beneficial or detrimental for insect and slug management? A meta-analysis. *Agriculture, Ecosystems & Environment*, 294. doi:10.1016/j.agee.2020.106849
- Sadras, V. O. (2008). Does partial root-zone drying improve irrigation water productivity in the field? A meta-analysis. *Irrigation Science*, 27(3), 183-190. doi:10.1007/s00271-008-0141-0
- Sainju, U. M. (2016). A global meta-analysis on the impact of management practices on net global warming potential and greenhouse gas intensity from cropland soils. *PLoS ONE*, 11(2). doi:10.1371/journal.pone.0148527
- Sha, Z., Ma, X., Wang, J., Lv, T., Li, Q., Misselbrook, T., & Liu, X. (2020). Effect of N stabilizers on fertilizer-N fate in the soil-crop system: A meta-analysis. *Agriculture, Ecosystems & Environment*, 290, 106763.
- Shackelford, G. E., Kelsey, R., & Dicks, L. V. (2019). Effects of cover crops on multiple ecosystem services: Ten meta-analyses of data from arable farmland in California and the Mediterranean. *Land Use Policy*, 88. doi:10.1016/j.landusepol.2019.104204
- Shan, J., & Yan, X. (2013). Effects of crop residue returning on nitrous oxide emissions in agricultural soils. *Atmospheric Environment*, 71, 170-175. doi:10.1016/j.atmosenv.2013.02.009
- Shrestha, U., Augé, R. M., & Butler, D. M. (2016). A meta-analysis of the impact of anaerobic soil disinfestation on pest suppression and yield of horticultural crops. *Frontiers in Plant Science*, 7(AUG2016). doi:10.3389/fpls.2016.01254
- Skaggs, R. W., Youssef, M. A., Gilliam, J. W., & Evans, R. O. (2010). Effect of controlled drainage on water and nitrogen balances in drained lands. *Transactions of the ASABE*, 53(6), 1843-1850. Retrieved from <https://www.scopus.com/inward/record.uri?eid=2-s2.0-78649507148&partnerID=40&md5=69456da6e009a396b01488627672d7fd>
- Sun, W., Canadell, J. G., Yu, L., Yu, L., Zhang, W., Smith, P., . . . Huang, Y. (2020). Climate drives global soil carbon sequestration and crop yield changes under conservation agriculture. *Glob Chang Biol*, 26(6), 3325-3335. doi:10.1111/gcb.15001
- Sun, Y., Zeng, Y., Shi, Q., Pan, X., & Huang, S. (2015). No-tillage controls on runoff: A meta-analysis. *Soil and Tillage Research*, 153, 1-6. doi:10.1016/j.still.2015.04.007
- Thapa, R., Mirsky, S. B., & Tully, K. L. (2018). Cover crops reduce nitrate leaching in agroecosystems: A global meta-analysis. *Journal of Environmental Quality*, 47(6), 1400-1411.
- Ti, C., Xia, L., Chang, S. X., & Yan, X. (2019). Potential for mitigating global agricultural ammonia emission: A meta-analysis. *Environmental Pollution*, 245, 141-148. doi:https://doi.org/10.1016/j.envpol.2018.10.124
- Tofanelli, M. B. D., & Wortman, S. E. (2020). Benchmarking the agronomic performance of biodegradable mulches against polyethylene mulch film: A meta-analysis. *Agronomy*, 10(10 October). doi:10.3390/agronomy10101618
- Tonhasca Jr, A., & Byrne, D. N. (1994). The effects of crop diversification on herbivorous insects: a meta-analysis approach. *Ecological Entomology*, 19(3), 239-244.
- Tonitto, C., David, M. B., & Drinkwater, L. E. (2006). Replacing bare fallows with cover crops in fertilizer-intensive cropping systems: A meta-analysis of crop yield and N dynamics. *Agriculture, Ecosystems and Environment*, 112(1), 58-72. doi:10.1016/j.agee.2005.07.003
- Tran, D. T. Q., Bradbury, M. I., van Ogtrop, F. F., Bozkurt, H., Jones, B. J., & McConchie, R. (2020). Environmental drivers for persistence of *Escherichia coli* and *salmonella* in manure-amended soils: A meta-analysis. *Journal of Food Protection*, 83(7), 1268-1277. doi:10.4315/0362-028X.JFP-19-460
- Ugarte, C. M., Kwon, H., Andrews, S. S., & Wander, M. M. (2014). A meta-analysis of soil organic matter response to soil management practices: An approach to evaluate conservation indicators. *Journal of Soil and Water Conservation*, 69(5), 422-430. doi:10.2489/jswc.69.5.422

- Valkama, E., Lemola, R., Känkänen, H., & Turtola, E. (2015). Meta-analysis of the effects of undersown catch crops on nitrogen leaching loss and grain yields in the Nordic countries. *Agriculture, Ecosystems and Environment*, 203, 93-101. doi:10.1016/j.agee.2015.01.023
- Van den Putte, A., Govers, G., Diels, J., Gillijns, K., & Demuzere, M. (2010). Assessing the effect of soil tillage on crop growth: A meta-regression analysis on European crop yields under conservation agriculture. *European Journal of Agronomy*, 33(3), 231-241. doi:10.1016/j.eja.2010.05.008
- Van Vooren, L., Reubens, B., Broekx, S., De Frenne, P., Nelissen, V., Pardon, P., & Verheyen, K. (2017). Ecosystem service delivery of agri-environment measures: A synthesis for hedgerows and grass strips on arable land. *Agriculture, Ecosystems & Environment*, 244, 32-51. doi:https://doi.org/10.1016/j.agee.2017.04.015
- Velthof, G. L. (2020). *Identification of most promising measures and practices*. Wageningen, The Netherlands: Wageningen University and Research.
- Venter, Z. S., Jacobs, K., & Hawkins, H. J. (2016). The impact of crop rotation on soil microbial diversity: A meta-analysis. *Pedobiologia*, 59(4), 215-223. doi:10.1016/j.pedobi.2016.04.001
- Veresoglou, S. D., Barto, E. K., Meneses, G., & Rillig, M. C. (2013). Fertilization affects severity of disease caused by fungal plant pathogens. *Plant Pathology*, 62(5), 961-969. doi:10.1111/ppa.12014
- Verret, V., Gardarin, A., Pelzer, E., Médiène, S., Makowski, D., & Valantin-Morison, M. (2017). Can legume companion plants control weeds without decreasing crop yield? A meta-analysis. *Field Crops Research*, 204, 158-168. doi:10.1016/j.fcr.2017.01.010
- Vicente-Vicente, J. L., García-Ruiz, R., Francaviglia, R., Aguilera, E., & Smith, P. (2016). Soil carbon sequestration rates under Mediterranean woody crops using recommended management practices: A meta-analysis. *Agriculture, Ecosystems and Environment*, 235, 204-214. doi:10.1016/j.agee.2016.10.024
- Wang, J., Pan, Z., Pan, F., He, D., Pan, Y., Han, G., . . . Wang, Z. (2020). The regional water-conserving and yield-increasing characteristics and suitability of soil tillage practices in Northern China. *Agricultural Water Management*, 228. doi:10.1016/j.agwat.2019.105883
- Wang, L., Coulter, J. A., Li, L., Luo, Z., Chen, Y., Deng, X., & Xie, J. (2020). Plastic mulching reduces nitrogen footprint of food crops in China: A meta-analysis. *Science of the Total Environment*, 748. doi:10.1016/j.scitotenv.2020.141479
- Wang, N., Ding, D., Malone, R. W., Chen, H., Wei, Y., Zhang, T., . . . Feng, H. (2020). When does plastic-film mulching yield more for dryland maize in the Loess Plateau of China? A meta-analysis. *Agricultural Water Management*, 240, 106290.
- Wang, Y., Guo, T., Qi, L., Zeng, H., Liang, Y., Wei, S., . . . Jia, Z. (2020). Meta-analysis of ridge-furrow cultivation effects on maize production and water use efficiency. *Agricultural Water Management*, 234. doi:10.1016/j.agwat.2020.106144
- Wang, Y., Zhang, Y., Zhou, S., & Wang, Z. (2018). Meta-analysis of no-tillage effect on wheat and maize water use efficiency in China. *Science of the Total Environment*, 635, 1372-1382. doi:10.1016/j.scitotenv.2018.04.202
- Wang, Z., Shao, G., Lu, J., Zhang, K., Gao, Y., & Ding, J. (2020). Effects of controlled drainage on crop yield, drainage water quantity and quality: A meta-analysis. *Agricultural Water Management*, 239. doi:10.1016/j.agwat.2020.106253
- Wei, H., Wang, S., Yang, W., Sun, H., Yin, L., & Deng, X. (2017). Meta analysis on impact of no-tillage and subsoiling tillage on spring maize and winter wheat yield and water use efficiency on the loess plateau. *Scientia Agricultura Sinica*, 50(3), 461-473. doi:10.3864/j.issn.0578-1752.2017.03.005
- West, T. O., & Post, W. M. (2002). Soil organic carbon sequestration rates by tillage and crop rotation: A global data analysis. *Soil Science Society of America Journal*, 66(6), 1930-1946. Retrieved from https://www.scopus.com/inward/record.uri?eid=2-s2.0-0036850951&partnerID=40&md5=b8f591b06e52d9d76c52f4acc1309920
- Xiao, L., Zhao, R., & Zhang, X. (2020). Crop cleaner production improvement potential under conservation agriculture in China: A meta-analysis. *Journal of Cleaner Production*, 269. doi:10.1016/j.jclepro.2020.122262
- Xu, C., Han, X., Bol, R., Smith, P., Wu, W., & Meng, F. (2017). Impacts of natural factors and farming practices on greenhouse gas emissions in the North China Plain: A meta-analysis. *Ecology and Evolution*, 7(17), 6702-6715. doi:10.1002/ece3.3211
- Xu, Z., Li, C., Zhang, C., Yu, Y., van der Werf, W., & Zhang, F. (2020). Intercropping maize and soybean increases efficiency of land and fertilizer nitrogen use; A meta-analysis. *Field Crops Research*, 246. doi:10.1016/j.fcr.2019.107661
- Yagi, K., Sriphiroom, P., Cha-un, N., Fusuwanakaya, K., Chidthaisong, A., Damen, B., & Towprayoon, S. (2019). Potential and promisingness of technical options for mitigating greenhouse gas emissions from rice cultivation in Southeast Asian countries. *Soil Science and Plant Nutrition*, 66(1), 37-49. doi:10.1080/00380768.2019.1683890
- Ye, G., Lin, Y., Luo, J., Di, H. J., Lindsey, S., Liu, D., . . . Ding, W. (2020). Responses of soil fungal diversity and community composition to long-term fertilization: Field experiment in an acidic Ultisol and literature synthesis. *Applied Soil Ecology*, 145. doi:10.1016/j.apsoil.2019.06.008
- Yin, M., Li, Y., Chen, P., Xu, L., Shen, S., & Wang, X. (2018). Effect of no-tillage on maize yield in northern region of China-a meta-analysis. *Scientia Agricultura Sinica*, 51(5), 843-854. doi:10.3864/j.issn.0578-1752.2018.05.004
- Yu, L., Zhao, X., Gao, X., & Siddique, K. H. M. (2020). Improving/maintaining water-use efficiency and yield of wheat by deficit irrigation: A global meta-analysis. *Agricultural Water Management*, 228. doi:10.1016/j.agwat.2019.105906

- Yu, Y., Stomph, T. J., Makowski, D., Zhang, L., & van der Werf, W. (2016). A meta-analysis of relative crop yields in cereal/legume mixtures suggests options for management. *Field Crops Research*, 198, 269-279. doi:10.1016/j.fcr.2016.08.001
- Zamorano, J., Bartomeus, I., Grez, A. A., & Garibaldi, L. A. (2020). Field margin floral enhancements increase pollinator diversity at the field edge but show no consistent spillover into the crop field: a meta-analysis. *Insect Conservation and Diversity*, 13(6), 519-531. doi:10.1111/icad.12454
- Zhang, C., Dong, Y., Tang, L., Zheng, Y., Makowski, D., Yu, Y., . . . van der Werf, W. (2019). Intercropping cereals with faba bean reduces plant disease incidence regardless of fertilizer input; a meta-analysis. *European Journal of Plant Pathology*, 154(4), 931-942. doi:10.1007/s10658-019-01711-4
- Zhang, X., Fang, Q., Zhang, T., Ma, W., Velthof, G. L., Hou, Y., . . . Zhang, F. (2020). Benefits and trade-offs of replacing synthetic fertilizers by animal manures in crop production in China: A meta-analysis. *Global Change Biology*, 26(2), 888-900. doi:10.1111/gcb.14826
- Zhang, Y., Xie, D., Ni, J., & Zeng, X. (2020). Conservation tillage practices reduce nitrogen losses in the sloping upland of the Three Gorges Reservoir area: No-till is better than mulch-till. *Agriculture, Ecosystems & Environment*, 300. doi:10.1016/j.agee.2020.107003
- Zhao, J., Yang, Y., Zhang, K., Jeong, J., Zeng, Z., & Zang, H. (2020). Does crop rotation yield more in China? A meta-analysis. *Field Crops Research*, 245. doi:10.1016/j.fcr.2019.107659
- Zhao, X., Liu, B. Y., Liu, S. L., Qi, J. Y., Wang, X., Pu, C., . . . Zhang, H. L. (2020). Sustaining crop production in China's cropland by crop residue retention: A meta-analysis. *Land Degradation and Development*, 31(6), 694-709. doi:10.1002/ldr.3492
- Zhao, X., Liu, S. L., Pu, C., Zhang, X. Q., Xue, J. F., Ren, Y. X., . . . Zhang, H. L. (2017). Crop yields under no-till farming in China: A meta-analysis. *European Journal of Agronomy*, 84, 67-75. doi:10.1016/j.eja.2016.11.009
- Zhao, X., Liu, S. L., Pu, C., Zhang, X. Q., Xue, J. F., Zhang, R., . . . Chen, F. (2016). Methane and nitrous oxide emissions under no-till farming in China: a meta-analysis. *Glob Chang Biol*, 22(4), 1372-1384. doi:10.1111/gcb.13185
- Zhao, X., Zhang, R., Xue, J. F., Pu, C., Zhang, X. Q., Liu, S. L., . . . Zhang, H. L. (2015) Management-Induced Changes to Soil Organic Carbon in China: A Meta-analysis. In: Vol. 134. *Advances in Agronomy* (pp. 1-50).
- Zheng, H., Shao, R., Xue, Y., Ying, H., Yin, Y., Cui, Z., & Yang, Q. (2020). Water productivity of irrigated maize production systems in Northern China: A meta-analysis. *Agricultural Water Management*, 234. doi:10.1016/j.agwat.2020.106119
- Zheng, H., Ying, H., Yin, Y., Wang, Y., He, G., Bian, Q., . . . Yang, Q. (2019). Irrigation leads to greater maize yield at higher water productivity and lower environmental costs: a global meta-analysis. *Agriculture, Ecosystems & Environment*, 273, 62-69. doi:10.1016/j.agee.2018.12.009
- Zheng, Y., Wang, H., Qin, Q., & Wang, Y. (2020). Effect of plant hedgerows on agricultural non-point source pollution: a meta-analysis. *Environmental Science and Pollution Research*, 27(20), 24831-24847. doi:10.1007/s11356-020-08988-7
- Zhou, L., Zhou, X., Shao, J., Nie, Y., He, Y., Jiang, L., . . . Hosseini Bai, S. (2016). Interactive effects of global change factors on soil respiration and its components: a meta-analysis. *Glob Chang Biol*, 22(9), 3157-3169. doi:10.1111/gcb.13253
- Zhou, X., Zhou, L., Nie, Y., Fu, Y., Du, Z., Shao, J., . . . Wang, X. (2016). Similar responses of soil carbon storage to drought and irrigation in terrestrial ecosystems but with contrasting mechanisms: A meta-analysis. *Agriculture, Ecosystems & Environment*, 228, 70-81. doi:10.1016/j.agee.2016.04.030
